# Supplementary material for: An Integrative Computational Approach for the Prediction of Human‐Plasmodium Protein‐Protein Interactions
Source: Hindawi journal article supplement (doi:10.1155/2020/2082540), 2020-01-01

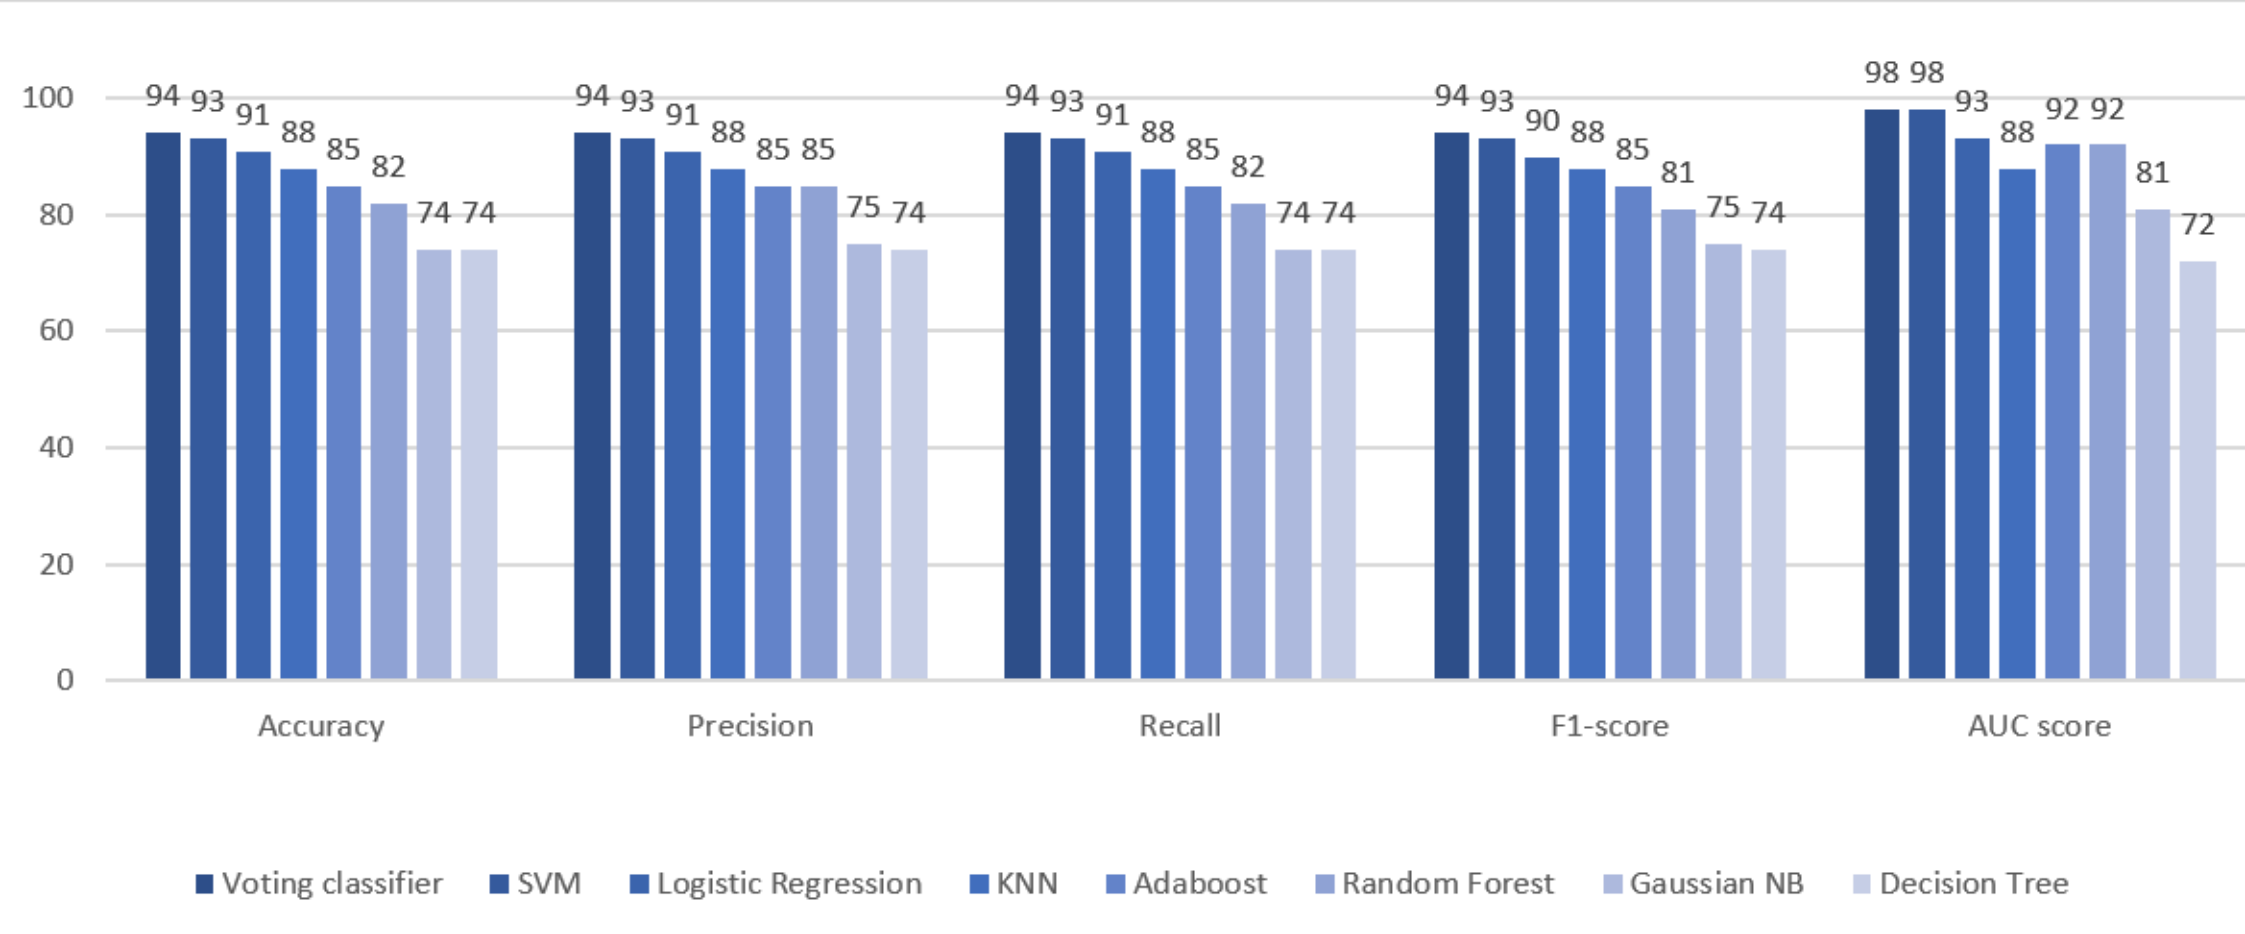

Supplement: f2 [file 2082540.f2.pdf]
