# Supplementary material for: An Integrative Computational Approach for the Prediction of Human‐Plasmodium Protein‐Protein Interactions
Source: Hindawi journal article supplement (doi:10.1155/2020/2082540), 2020-01-01
Supplement: f3 [file 2082540.f3.pdf]

Sheet1

**Supplementary Table 1 : Human-Plasmodium falciparum 3D7 protein Protein interactions predicted by the present integrative computational Approach.**

| Symbol | Description                                                       | PF ID         | Aliases   | Description                                                                   | Expression by stage | GO term    |
|--------|-------------------------------------------------------------------|---------------|-----------|-------------------------------------------------------------------------------|---------------------|------------|
| ABCB6  | ATP binding cassette subfamily B member 6 (Langereis blood group) | PF3D7_0302600 | PFC0125w  | ABC transporter, putative                                                     | Gametocytes         |            |
| ABCB6  | ATP binding cassette subfamily B member 6 (Langereis blood group) | PF3D7_1339900 | PF13_0218 |                                                                               |                     |            |
| ABCB6  | ATP binding cassette subfamily B member 6 (Langereis blood group) | PF3D7_1352100 | PF13_0271 | ABC transporter, (heavy metal transporter family) [Plasmodium falciparum 3D7] | Global              | GO:0006810 |
| ABCE1  | ATP binding cassette subfamily E member 1                         | PF3D7_0212300 | PF02_0115 |                                                                               |                     |            |
| ABCE1  | ATP binding cassette subfamily E member 1                         | PF3D7_0302600 | PFC0125w  | ABC transporter, putative                                                     | Gametocytes         |            |
| ABCE1  | ATP binding cassette subfamily E member 1                         | PF3D7_1339900 | PF13_0218 |                                                                               |                     |            |
| ABCE1  | ATP binding cassette subfamily E member 1                         | PF3D7_1352100 | PF13_0271 | ABC transporter, (heavy metal transporter family) [Plasmodium falciparum 3D7] | Global              | GO:0006810 |
| ABCE1  | ATP binding cassette subfamily E member 1                         | PF3D7_1426500 | PF14_0244 | ABC transporter, putative                                                     | Gametocytes         |            |
| ABCE1  | ATP binding cassette subfamily E member 1                         | PF3D7_1447900 | PF14_0455 |                                                                               |                     |            |

Sheet1

|       |                                                                |               |           |                                                                               |                    |            |
|-------|----------------------------------------------------------------|---------------|-----------|-------------------------------------------------------------------------------|--------------------|------------|
| ABCG2 | ATP binding cassette subfamily G member 2 (Junior blood group) | PF3D7_0302600 | PFC0125w  | ABC transporter, putative                                                     | Gametocytes        |            |
| ABCG2 | ATP binding cassette subfamily G member 2 (Junior blood group) | PF3D7_1339900 | PF13_0218 |                                                                               |                    |            |
| ABCG2 | ATP binding cassette subfamily G member 2 (Junior blood group) | PF3D7_1352100 | PF13_0271 | ABC transporter, (heavy metal transporter family) [Plasmodium falciparum 3D7] | Global             | GO:0006810 |
| ABCG2 | ATP binding cassette subfamily G member 2 (Junior blood group) | PF3D7_1426500 | PF14_0244 | ABC transporter, putative                                                     | Gametocytes        |            |
| ABCG2 | ATP binding cassette subfamily G member 2 (Junior blood group) | PF3D7_1447900 | PF14_0455 |                                                                               |                    |            |
| ACAP2 | ArfGAP with coiled-coil, ankyrin repeat and PH domains 2       | PF3D7_0309000 | PFC0380w  | dual-specificity protein phosphatase , putative                               | Troph/ Gametocytes |            |
| ACAP2 | ArfGAP with coiled-coil, ankyrin repeat and PH domains 2       | PF3D7_0317200 | PFC0755c  | protein kinase, putative [Plasmodium falciparum 3D7]                          | Schizont           | GO:0006468 |
| ACAP2 | ArfGAP with coiled-coil, ankyrin repeat and PH domains 2       | PF3D7_0528500 | PFE1420w  |                                                                               |                    |            |
| ACAP2 | ArfGAP with coiled-coil, ankyrin repeat and PH domains 2       | PF3D7_1121300 | PF11_0220 | hypothetical protein                                                          | Troph/ Gametocytes |            |

Sheet1

|       |                                                          |               |             |                                                                                         |                   |            |
|-------|----------------------------------------------------------|---------------|-------------|-----------------------------------------------------------------------------------------|-------------------|------------|
| ACAP2 | ArfGAP with coiled-coil, ankyrin repeat and PH domains 2 | PF3D7_1247800 | PFL2290w    | preprocathepsin c precursor, putative                                                   | Troph/Gametocytes |            |
| ACAP2 | ArfGAP with coiled-coil, ankyrin repeat and PH domains 2 | PF3D7_1329300 | PF13_0149   | chromatin assembly factor 1 subunit, putative [Plasmodium falciparum 3D7]               | Global            | GO:0006333 |
| ACAP2 | ArfGAP with coiled-coil, ankyrin repeat and PH domains 2 | PF3D7_1359800 | MAL13P1.297 |                                                                                         |                   |            |
| ACAP2 | ArfGAP with coiled-coil, ankyrin repeat and PH domains 2 | PF3D7_1442900 | PF14_0407   | guanine nucleotide exchange factor, putative [Plasmodium falciparum 3D7]                | Ring              | GO:0032012 |
| ACLY  | ATP citrate lyase                                        | PF3D7_1108500 | PF11_0097   | succinyl-CoA synthetase alpha subunit, putative [Plasmodium falciparum 3D7]             | Troph/Schizont    | GO:0006104 |
| ACLY  | ATP citrate lyase                                        | PF3D7_1431600 | PF14_0295   | ATP-specific succinyl-CoA synthetase beta subunit, putative [Plasmodium falciparum 3D7] | Global            | GO:0006104 |
| ACSL1 | acyl-CoA synthetase long chain family member 1           | PF3D7_0627800 | PFF1350c    |                                                                                         |                   |            |
| ACSL3 | acyl-CoA synthetase long chain family member 3           | PF3D7_0627800 | PFF1350c    |                                                                                         |                   |            |

Sheet1

|       |                                                |               |             |                                                                  |                   |            |
|-------|------------------------------------------------|---------------|-------------|------------------------------------------------------------------|-------------------|------------|
| ACSL4 | acyl-CoA synthetase long chain family member 4 | PF3D7_0627800 | PFF1350c    |                                                                  |                   |            |
| ACSL6 | acyl-CoA synthetase long chain family member 6 | PF3D7_0627800 | PFF1350c    |                                                                  |                   |            |
| ACTB  | actin beta                                     | PF3D7_0317200 | PFC0755c    | protein kinase, putative [Plasmodium falciparum 3D7]             | Schizont          | GO:0006468 |
| ACTB  | actin beta                                     | PF3D7_0528500 | PFE1420w    |                                                                  |                   |            |
| ACTB  | actin beta                                     | PF3D7_0613900 | PFF0675c    | myosin E [Plasmodium falciparum 3D7]                             | Schizont          | GO:0003774 |
| ACTB  | actin beta                                     | PF3D7_1346000 | MAL13P1.23C | hypothetical protein                                             | Gametocytes       |            |
| AGFG1 | ArfGAP with FG repeats 1                       | PF3D7_1359800 | MAL13P1.297 |                                                                  |                   |            |
| ANK1  | ankyrin 1                                      | PF3D7_0317200 | PFC0755c    | protein kinase, putative [Plasmodium falciparum 3D7]             | Schizont          | GO:0006468 |
| ANK1  | ankyrin 1                                      | PF3D7_1359800 | MAL13P1.297 |                                                                  |                   |            |
| ANK3  | ankyrin 3                                      | PF3D7_0309000 | PFC0380w    | dual-specificity protein phosphatase, putative                   | Troph/Gametocytes |            |
| ANK3  | ankyrin 3                                      | PF3D7_0317200 | PFC0755c    | protein kinase, putative [Plasmodium falciparum 3D7]             | Schizont          | GO:0006468 |
| ANK3  | ankyrin 3                                      | PF3D7_0528500 | PFE1420w    |                                                                  |                   |            |
| ANK3  | ankyrin 3                                      | PF3D7_1247800 | PFL2290w    | preprocathepsin c precursor, putative                            | Troph/Gametocytes |            |
| ANK3  | ankyrin 3                                      | PF3D7_1358000 | MAL13P1.285 | patatin-like phospholipase, putative [Plasmodium falciparum 3D7] | Global            | GO:0006629 |

Sheet1

|       |                                                   |                   |             |                                                                   |        |            |
|-------|---------------------------------------------------|-------------------|-------------|-------------------------------------------------------------------|--------|------------|
| ANK3  | ankyrin 3                                         | PF3D7_1359<br>800 | MAL13P1.297 |                                                                   |        |            |
| AP1B1 | adaptor related protein complex 1 subunit beta 1  | PF3D7_1145<br>100 | PF11_0463   | coat protein, gamma subunit, putative [Plasmodium falciparum 3D7] | Global | GO:0006886 |
| AP1B1 | adaptor related protein complex 1 subunit beta 1  | PF3D7_1359<br>800 | MAL13P1.297 |                                                                   |        |            |
| AP1G1 | adaptor related protein complex 1 subunit gamma 1 | PF3D7_1145<br>100 | PF11_0463   | coat protein, gamma subunit, putative [Plasmodium falciparum 3D7] | Global | GO:0006886 |
| AP1G1 | adaptor related protein complex 1 subunit gamma 1 | PF3D7_1359<br>800 | MAL13P1.297 |                                                                   |        |            |
| AP1M1 | adaptor related protein complex 1 subunit mu 1    | PF3D7_1359<br>800 | MAL13P1.297 |                                                                   |        |            |
| AP2A1 | adaptor related protein complex 2 subunit alpha 1 | PF3D7_1145<br>100 | PF11_0463   | coat protein, gamma subunit, putative [Plasmodium falciparum 3D7] | Global | GO:0006886 |
| AP2A2 | adaptor related protein complex 2 subunit alpha 2 | PF3D7_1145<br>100 | PF11_0463   | coat protein, gamma subunit, putative [Plasmodium falciparum 3D7] | Global | GO:0006886 |
| AP2A2 | adaptor related protein complex 2 subunit alpha 2 | PF3D7_1359<br>800 | MAL13P1.297 |                                                                   |        |            |

Sheet1

|       |                                                  |               |             |                                                                                         |                   |            |
|-------|--------------------------------------------------|---------------|-------------|-----------------------------------------------------------------------------------------|-------------------|------------|
| AP2B1 | adaptor related protein complex 2 subunit beta 1 | PF3D7_1145100 | PF11_0463   | coat protein, gamma subunit, putative [Plasmodium falciparum 3D7]                       | Global            | GO:0006886 |
| AP2B1 | adaptor related protein complex 2 subunit beta 1 | PF3D7_1359800 | MAL13P1.297 |                                                                                         |                   |            |
| AP2M1 | adaptor related protein complex 2 subunit mu 1   | PF3D7_1359800 | MAL13P1.297 |                                                                                         |                   |            |
| ARAF  | A-Raf proto-oncogene, serine/threonine kinase    | PF3D7_0317200 | PFC0755c    | protein kinase, putative [Plasmodium falciparum 3D7]                                    | Schizont          | GO:0006468 |
| ARAF  | A-Raf proto-oncogene, serine/threonine kinase    | PF3D7_1121300 | PF11_0220   | hypothetical protein                                                                    | Troph/Gametocytes |            |
| ARAF  | A-Raf proto-oncogene, serine/threonine kinase    | PF3D7_1243900 | PFL2110c    | conserved protein [Plasmodium falciparum 3D7]                                           |                   |            |
| ARAF  | A-Raf proto-oncogene, serine/threonine kinase    | PF3D7_1247400 | PFL2275c    | FK506-binding protein (FKBP)-type peptidyl-propyl isomerase [Plasmodium falciparum 3D7] | Troph             | GO:0006457 |
| ARF1  | ADP ribosylation factor 1                        | PF3D7_1359800 | MAL13P1.297 |                                                                                         |                   |            |
| ARF6  | ADP ribosylation factor 6                        | PF3D7_1359800 | MAL13P1.297 |                                                                                         |                   |            |
| ARL2  | ADP ribosylation factor like GTPase 2            | PF3D7_1359800 | MAL13P1.297 |                                                                                         |                   |            |

Sheet1

|       |                                                        |               |             |                                                                           |                       |            |
|-------|--------------------------------------------------------|---------------|-------------|---------------------------------------------------------------------------|-----------------------|------------|
| ARL2  | ADP ribosylation factor like GTPase 2                  | PF3D7_1442900 | PF14_0407   | guanine nucleotide exchange factor, putative [Plasmodium falciparum 3D7]  | Ring                  | GO:0032012 |
| ARL3  | ADP ribosylation factor like GTPase 3                  | PF3D7_1359800 | MAL13P1.297 |                                                                           |                       |            |
| ARL8B | ADP ribosylation factor like GTPase 8B                 | PF3D7_1359800 | MAL13P1.297 |                                                                           |                       |            |
| ARPC5 | actin related protein 2/3 complex subunit 5            | PF3D7_1329300 | PF13_0149   | chromatin assembly factor 1 subunit, putative [Plasmodium falciparum 3D7] | Global                | GO:0006333 |
| ASAP1 | ArfGAP with SH3 domain, ankyrin repeat and PH domain 1 | PF3D7_0309000 | PFC0380w    | dual-specificity protein phosphatase , putative                           | Troph/<br>Gametocytes |            |
| ASAP1 | ArfGAP with SH3 domain, ankyrin repeat and PH domain 1 | PF3D7_0317200 | PFC0755c    | protein kinase, putative [Plasmodium falciparum 3D7]                      | Schizont              | GO:0006468 |
| ASAP1 | ArfGAP with SH3 domain, ankyrin repeat and PH domain 1 | PF3D7_0528500 | PFE1420w    |                                                                           |                       |            |
| ASAP1 | ArfGAP with SH3 domain, ankyrin repeat and PH domain 1 | PF3D7_1121300 | PF11_0220   | hypothetical protein                                                      | Troph/<br>Gametocytes |            |
| ASAP1 | ArfGAP with SH3 domain, ankyrin repeat and PH domain 1 | PF3D7_1247800 | PFL2290w    | preprocathepsin c precursor, putative                                     | Troph/<br>Gametocytes |            |
| ASAP1 | ArfGAP with SH3 domain, ankyrin repeat and PH domain 1 | PF3D7_1329300 | PF13_0149   | chromatin assembly factor 1 subunit, putative [Plasmodium falciparum 3D7] | Global                | GO:0006333 |

Sheet1

|       |                                                        |               |             |                                                                          |          |            |
|-------|--------------------------------------------------------|---------------|-------------|--------------------------------------------------------------------------|----------|------------|
| ASAP1 | ArfGAP with SH3 domain, ankyrin repeat and PH domain 1 | PF3D7_1359800 | MAL13P1.297 |                                                                          |          |            |
| ASAP1 | ArfGAP with SH3 domain, ankyrin repeat and PH domain 1 | PF3D7_1442900 | PF14_0407   | guanine nucleotide exchange factor, putative [Plasmodium falciparum 3D7] | Ring     | GO:0032012 |
| ATG7  | autophagy related 7                                    | PF3D7_1237000 | PFL1790w    | ubiquitin-activating enzyme, putative [Plasmodium falciparum 3D7]        | Global   | GO:0006464 |
| ATL3  | atlastin GTPase 3                                      | PF3D7_0317200 | PFC0755c    | protein kinase, putative [Plasmodium falciparum 3D7]                     | Schizont | GO:0006468 |
| ATL3  | atlastin GTPase 3                                      | PF3D7_0616500 | PFF0800w    |                                                                          |          |            |
| ATP7A | ATPase copper transporting alpha                       | PF3D7_0106300 | PFA0310c    | calcium-transporting ATPase, putative [Plasmodium falciparum 3D7]        | Global   | GO:0006754 |
| BAG1  | BAG cochaperone 1                                      | PF3D7_0317200 | PFC0755c    | protein kinase, putative [Plasmodium falciparum 3D7]                     | Schizont | GO:0006468 |
| BAG1  | BAG cochaperone 1                                      | PF3D7_1355700 | MAL13P1.275 | protein phosphatase, putative [Plasmodium falciparum 3D7]                | Global   | None       |
| BAG1  | BAG cochaperone 1                                      | PF3D7_1361900 | PF13_0328   | proliferating cell nuclear antigen [Plasmodium falciparum 3D7]           | Troph    | GO:0006275 |
| BBS1  | Bardet-Biedl syndrome 1                                | PF3D7_1359800 | MAL13P1.297 |                                                                          |          |            |



Sheet1

|      |                                                     |                   |           |                                                      |             |            |
|------|-----------------------------------------------------|-------------------|-----------|------------------------------------------------------|-------------|------------|
| BCAM | basal cell adhesion molecule (Lutheran blood group) | PF3D7_0100<br>100 | PFA0005w  | erythrocyte membrane protein 1 (PfEMP1)              | Merozoites  |            |
| BCAM | basal cell adhesion molecule (Lutheran blood group) | PF3D7_0207<br>000 | PF02_0066 |                                                      |             |            |
| BCAM | basal cell adhesion molecule (Lutheran blood group) | PF3D7_0208<br>600 | PF02_0082 |                                                      |             |            |
| BCAM | basal cell adhesion molecule (Lutheran blood group) | PF3D7_0302<br>600 | PFC0125w  | ABC transporter, putative                            | Gametocytes |            |
| BCAM | basal cell adhesion molecule (Lutheran blood group) | PF3D7_0317<br>200 | PFC0755c  | protein kinase, putative [Plasmodium falciparum 3D7] | Schizont    | GO:0006468 |
| BCAM | basal cell adhesion molecule (Lutheran blood group) | PF3D7_0321<br>500 | PFC0950c  | peptidase, putative [Plasmodium falciparum 3D7]      | Troph       | GO:0006508 |
| BCAM | basal cell adhesion molecule (Lutheran blood group) | PF3D7_0400<br>100 | PFD0005w  | erythrocyte membrane protein 1 (PfEMP1)              | Troph       |            |
| BCAM | basal cell adhesion molecule (Lutheran blood group) | PF3D7_0400<br>400 | PFD0020c  | erythrocyte membrane protein 1 (PfEMP1)              | Merozoites  |            |
| BCAM | basal cell adhesion molecule (Lutheran blood group) | PF3D7_0412<br>700 | PFD0625c  |                                                      |             |            |
| BCAM | basal cell adhesion molecule (Lutheran blood group) | PF3D7_0420<br>700 | PFD0995c  | erythrocyte membrane protein 1 (PfEMP1)              | Merozoites  |            |
| BCAM | basal cell adhesion molecule (Lutheran blood group) | PF3D7_0420<br>900 | PFD1000c  | erythrocyte membrane protein 1 (PfEMP1)              | Merozoites  |            |

Sheet1

|      |                                                     |                   |           |                                                                                             |                            |            |
|------|-----------------------------------------------------|-------------------|-----------|---------------------------------------------------------------------------------------------|----------------------------|------------|
| BCAM | basal cell adhesion molecule (Lutheran blood group) | PF3D7_0421<br>100 | PFD1005c  | erythrocyte membrane protein 1 (PfEMP1)                                                     | Merozoites                 |            |
| BCAM | basal cell adhesion molecule (Lutheran blood group) | PF3D7_0421<br>300 | PFD1015c  | erythrocyte membrane protein 1 (PfEMP1)                                                     | Merozoites/<br>Gametocytes |            |
| BCAM | basal cell adhesion molecule (Lutheran blood group) | PF3D7_0425<br>800 | PFD1235w  | erythrocyte membrane protein 1 (PfEMP1)                                                     | Merozoites/<br>Gametocytes |            |
| BCAM | basal cell adhesion molecule (Lutheran blood group) | PF3D7_0500<br>100 | PFE0005w  | erythrocyte membrane protein 1 (PfEMP1)                                                     | Merozoites                 |            |
| BCAM | basal cell adhesion molecule (Lutheran blood group) | PF3D7_0523<br>800 | PFE1185w  | transporter, putative                                                                       | Merozoites                 |            |
| BCAM | basal cell adhesion molecule (Lutheran blood group) | PF3D7_0600<br>200 | PFF0010w  |                                                                                             |                            |            |
| BCAM | basal cell adhesion molecule (Lutheran blood group) | PF3D7_0616<br>500 | PFF0800w  |                                                                                             |                            |            |
| BCAM | basal cell adhesion molecule (Lutheran blood group) | PF3D7_0629<br>300 | PFF1420w  | phosphatidyl choline-sterol acyltransferase precursor, putative [Plasmodium falciparum 3D7] | Unknown                    | GO:0006629 |
| BCAM | basal cell adhesion molecule (Lutheran blood group) | PF3D7_0632<br>500 | PFF1580c  |                                                                                             |                            |            |
| BCAM | basal cell adhesion molecule (Lutheran blood group) | PF3D7_0632<br>800 | PFF1595c  |                                                                                             |                            |            |
| BCAM | basal cell adhesion molecule (Lutheran blood group) | PF3D7_0712<br>800 | MAL7P1.55 | erythrocyte membrane protein 1 (PfEMP1)                                                     | Gametocytes                |            |

Sheet1

|      |                                                     |               |           |                                                                      |                        |            |
|------|-----------------------------------------------------|---------------|-----------|----------------------------------------------------------------------|------------------------|------------|
| BCAM | basal cell adhesion molecule (Lutheran blood group) | PF3D7_0733000 | PF07_0139 | erythrocyte membrane protein 1 (PfEMP1)                              | Merozoites/Troph       |            |
| BCAM | basal cell adhesion molecule (Lutheran blood group) | PF3D7_0800200 | PF08_0141 | erythrocyte membrane protein 1 (PfEMP1)                              | Merozoites/Troph       |            |
| BCAM | basal cell adhesion molecule (Lutheran blood group) | PF3D7_0808600 | PF08_0107 | erythrocyte membrane protein 1 (PfEMP1)                              | Merozoites             |            |
| BCAM | basal cell adhesion molecule (Lutheran blood group) | PF3D7_0809100 | PF08_0103 | erythrocyte membrane protein 1 (PfEMP1)                              | Merozoites             |            |
| BCAM | basal cell adhesion molecule (Lutheran blood group) | PF3D7_0823300 | PF08_0034 | histone acetyltransferase GCN5, putative [Plasmodium falciparum 3D7] | Global                 | GO:0006355 |
| BCAM | basal cell adhesion molecule (Lutheran blood group) | PF3D7_0911300 | PFI0550w  | hypothetical protein                                                 | Sporozoites/Merozoites |            |
| BCAM | basal cell adhesion molecule (Lutheran blood group) | PF3D7_0937800 | PFI1830c  | pfEMP1                                                               | Troph/Gametocytes      |            |
| BCAM | basal cell adhesion molecule (Lutheran blood group) | PF3D7_1100200 | PF11_0008 | erythrocyte membrane protein 1 (PfEMP1)                              | Merozoites             |            |
| BCAM | basal cell adhesion molecule (Lutheran blood group) | PF3D7_1200100 | PFL0005w  | erythrocyte membrane protein 1 (PfEMP1)                              | Merozoites             |            |
| BCAM | basal cell adhesion molecule (Lutheran blood group) | PF3D7_1200400 | PFL0020w  | erythrocyte membrane protein 1 (PfEMP1)                              | Merozoites             |            |
| BCAM | basal cell adhesion molecule (Lutheran blood group) | PF3D7_1200600 | PFL0030c  | erythrocyte membrane protein 1 (PfEMP1)                              | Merozoites             |            |

Sheet1

|      |                                                     |                   |           |                                                                               |                       |            |
|------|-----------------------------------------------------|-------------------|-----------|-------------------------------------------------------------------------------|-----------------------|------------|
| BCAM | basal cell adhesion molecule (Lutheran blood group) | PF3D7_1240<br>400 | PFL1955w  | erythrocyte membrane protein 1 (PfEMP1)                                       | Gametocytes           |            |
| BCAM | basal cell adhesion molecule (Lutheran blood group) | PF3D7_1247<br>800 | PFL2290w  | preprocathepsin c precursor, putative                                         | Troph/<br>Gametocytes |            |
| BCAM | basal cell adhesion molecule (Lutheran blood group) | PF3D7_1251<br>700 | PFL2485c  |                                                                               |                       |            |
| BCAM | basal cell adhesion molecule (Lutheran blood group) | PF3D7_1255<br>200 | PFL2665c  | erythrocyte membrane protein 1 (PfEMP1)                                       | Troph/<br>Gametocytes |            |
| BCAM | basal cell adhesion molecule (Lutheran blood group) | PF3D7_1300<br>300 | PF13_0003 | erythrocyte membrane protein 1 (PfEMP1)                                       | Merozoites            |            |
| BCAM | basal cell adhesion molecule (Lutheran blood group) | PF3D7_1329<br>300 | PF13_0149 | chromatin assembly factor 1 subunit, putative [Plasmodium falciparum 3D7]     | Global                | GO:0006333 |
| BCAM | basal cell adhesion molecule (Lutheran blood group) | PF3D7_1339<br>900 | PF13_0218 |                                                                               |                       |            |
| BCAM | basal cell adhesion molecule (Lutheran blood group) | PF3D7_1352<br>100 | PF13_0271 | ABC transporter, (heavy metal transporter family) [Plasmodium falciparum 3D7] | Global                | GO:0006810 |
| BCAM | basal cell adhesion molecule (Lutheran blood group) | PF3D7_1411<br>400 | PF14_0112 |                                                                               |                       |            |
| BCAM | basal cell adhesion molecule (Lutheran blood group) | PF3D7_1430<br>900 | PF14_0288 | cytochrome C oxidase subunit II precursor, putative                           | Gametocytes           |            |

Sheet1

|       |                                            |               |           |                                                                                         |                   |            |
|-------|--------------------------------------------|---------------|-----------|-----------------------------------------------------------------------------------------|-------------------|------------|
| BMP2K | BMP2 inducible kinase                      | PF3D7_0309000 | PFC0380w  | dual-specificity protein phosphatase , putative                                         | Troph/Gametocytes |            |
| BMP2K | BMP2 inducible kinase                      | PF3D7_0317200 | PFC0755c  | protein kinase, putative [Plasmodium falciparum 3D7]                                    | Schizont          | GO:0006468 |
| BMP2K | BMP2 inducible kinase                      | PF3D7_1030800 | PF10_0301 | calmodulin, putative [Plasmodium falciparum 3D7]                                        | Global            | GO:0005509 |
| BMP2K | BMP2 inducible kinase                      | PF3D7_1121300 | PF11_0220 | hypothetical protein                                                                    | Troph/Gametocytes |            |
| BMP2K | BMP2 inducible kinase                      | PF3D7_1135100 | PF11_0362 | protein phosphatase , putative [Plasmodium falciparum 3D7]                              | Ring/Schizont     | None       |
| BMP2K | BMP2 inducible kinase                      | PF3D7_1247400 | PFL2275c  | FK506-binding protein (FKBP)-type peptidyl-propyl isomerase [Plasmodium falciparum 3D7] | Troph             | GO:0006457 |
| BMP2K | BMP2 inducible kinase                      | PF3D7_1342400 | PF13_0232 | casein kinase II beta chain [Plasmodium falciparum 3D7]                                 | Troph             | GO:0004674 |
| BMPR2 | bone morphogenetic protein receptor type 2 | PF3D7_0309000 | PFC0380w  | dual-specificity protein phosphatase , putative                                         | Troph/Gametocytes |            |
| BMPR2 | bone morphogenetic protein receptor type 2 | PF3D7_0317200 | PFC0755c  | protein kinase, putative [Plasmodium falciparum 3D7]                                    | Schizont          | GO:0006468 |
| BMPR2 | bone morphogenetic protein receptor type 2 | PF3D7_1121300 | PF11_0220 | hypothetical protein                                                                    | Troph/Gametocytes |            |

Sheet1

|       |                                            |                   |           |                                                                                         |                       |            |
|-------|--------------------------------------------|-------------------|-----------|-----------------------------------------------------------------------------------------|-----------------------|------------|
| BMPR2 | bone morphogenetic protein receptor type 2 | PF3D7_1135<br>100 | PF11_0362 | protein phosphatase, putative [Plasmodium falciparum 3D7]                               | Ring/Schizont         | None       |
| BMPR2 | bone morphogenetic protein receptor type 2 | PF3D7_1247<br>400 | PFL2275c  | FK506-binding protein (FKBP)-type peptidyl-propyl isomerase [Plasmodium falciparum 3D7] | Troph                 | GO:0006457 |
| BMPR2 | bone morphogenetic protein receptor type 2 | PF3D7_1342<br>400 | PF13_0232 | casein kinase II beta chain [Plasmodium falciparum 3D7]                                 | Troph                 | GO:0004674 |
| BTK   | Bruton tyrosine kinase                     | PF3D7_0317<br>200 | PFC0755c  | protein kinase, putative [Plasmodium falciparum 3D7]                                    | Schizont              | GO:0006468 |
| BTK   | Bruton tyrosine kinase                     | PF3D7_0515<br>300 | PFE0765w  | phosphatidylinositol 3-kinase, putative [Plasmodium falciparum 3D7]                     | Global                | GO:0006897 |
| BTK   | Bruton tyrosine kinase                     | PF3D7_1121<br>300 | PF11_0220 | hypothetical protein                                                                    | Troph/<br>Gametocytes |            |
| BTK   | Bruton tyrosine kinase                     | PF3D7_1243<br>900 | PFL2110c  | conserved protein [Plasmodium falciparum 3D7]                                           |                       |            |
| BTK   | Bruton tyrosine kinase                     | PF3D7_1247<br>400 | PFL2275c  | FK506-binding protein (FKBP)-type peptidyl-propyl isomerase [Plasmodium falciparum 3D7] | Troph                 | GO:0006457 |

Sheet1

|       |                            |               |             |                                                                                         |          |            |
|-------|----------------------------|---------------|-------------|-----------------------------------------------------------------------------------------|----------|------------|
| BTK   | Bruton tyrosine kinase     | PF3D7_1329300 | PF13_0149   | chromatin assembly factor 1 subunit, putative [Plasmodium falciparum 3D7]               | Global   | GO:0006333 |
| BTK   | Bruton tyrosine kinase     | PF3D7_1359800 | MAL13P1.297 |                                                                                         |          |            |
| BTK   | Bruton tyrosine kinase     | PF3D7_1442900 | PF14_0407   | guanine nucleotide exchange factor, putative [Plasmodium falciparum 3D7]                | Ring     | GO:0032012 |
| CAB39 | calcium binding protein 39 | PF3D7_0317200 | PFC0755c    | protein kinase, putative [Plasmodium falciparum 3D7]                                    | Schizont | GO:0006468 |
| CALM1 | calmodulin 1               | PF3D7_0317200 | PFC0755c    | protein kinase, putative [Plasmodium falciparum 3D7]                                    | Schizont | GO:0006468 |
| CALM1 | calmodulin 1               | PF3D7_1030800 | PF10_0301   | calmodulin, putative [Plasmodium falciparum 3D7]                                        | Global   | GO:0005509 |
| CALM1 | calmodulin 1               | PF3D7_1238700 | PFL1875w    | conserved Plasmodium protein [Plasmodium falciparum 3D7]                                | Unknown  | GO:0006813 |
| CALM1 | calmodulin 1               | PF3D7_1247400 | PFL2275c    | FK506-binding protein (FKBP)-type peptidyl-propyl isomerase [Plasmodium falciparum 3D7] | Troph    | GO:0006457 |
| CALM2 | calmodulin 2               | PF3D7_0317200 | PFC0755c    | protein kinase, putative [Plasmodium falciparum 3D7]                                    | Schizont | GO:0006468 |

Sheet1

|       |                                                              |                   |           |                                                                                                                      |          |            |
|-------|--------------------------------------------------------------|-------------------|-----------|----------------------------------------------------------------------------------------------------------------------|----------|------------|
| CALM2 | calmodulin 2                                                 | PF3D7_1030<br>800 | PF10_0301 | calmodulin,<br>putative<br>[Plasmodium<br>falciparum<br>3D7]                                                         | Global   | GO:0005509 |
| CALM2 | calmodulin 2                                                 | PF3D7_1238<br>700 | PFL1875w  | conserved<br>Plasmodium<br>protein<br>[Plasmodium<br>falciparum<br>3D7]                                              | Unknown  | GO:0006813 |
| CALM2 | calmodulin 2                                                 | PF3D7_1247<br>400 | PFL2275c  | FK506-<br>binding<br>protein<br>(FKBP)-type<br>peptidyl-<br>propyl<br>isomerase<br>[Plasmodium<br>falciparum<br>3D7] | Troph    | GO:0006457 |
| CALM3 | calmodulin 3                                                 | PF3D7_0317<br>200 | PFC0755c  | protein<br>kinase,<br>putative<br>[Plasmodium<br>falciparum<br>3D7]                                                  | Schizont | GO:0006468 |
| CALM3 | calmodulin 3                                                 | PF3D7_1030<br>800 | PF10_0301 | calmodulin,<br>putative<br>[Plasmodium<br>falciparum<br>3D7]                                                         | Global   | GO:0005509 |
| CALM3 | calmodulin 3                                                 | PF3D7_1238<br>700 | PFL1875w  | conserved<br>Plasmodium<br>protein<br>[Plasmodium<br>falciparum<br>3D7]                                              | Unknown  | GO:0006813 |
| CALM3 | calmodulin 3                                                 | PF3D7_1247<br>400 | PFL2275c  | FK506-<br>binding<br>protein<br>(FKBP)-type<br>peptidyl-<br>propyl<br>isomerase<br>[Plasmodium<br>falciparum<br>3D7] | Troph    | GO:0006457 |
| CAPZB | capping actin<br>protein of<br>muscle Z-line<br>subunit beta | PF3D7_0528<br>500 | PFE1420w  |                                                                                                                      |          |            |



Sheet1

|       |                                                       |                   |            |                                                                                                                     |                            |            |
|-------|-------------------------------------------------------|-------------------|------------|---------------------------------------------------------------------------------------------------------------------|----------------------------|------------|
| CASP8 | caspase 8                                             | PF3D7_0317<br>200 | PFC0755c   | protein<br>kinase,<br>putative<br>[Plasmodium<br>falciparum<br>3D7]                                                 | Schizont                   | GO:0006468 |
| CBR1  | carbonyl<br>reductase 1                               | PF3D7_0422<br>000 | PFD1035w   | steroid<br>dehydrogena<br>se, putative<br>[Plasmodium<br>falciparum<br>3D7]                                         | Global                     | GO:0006633 |
| CBX3  | chromobox 3                                           | PF3D7_0727<br>300 | MAL7P1.151 | Chromodom<br>ain-helicase-<br>DNA-binding<br>protein 1<br>homolog,<br>putative<br>[Plasmodium<br>falciparum<br>3D7] | Global                     | GO:0006333 |
| CBX3  | chromobox 3                                           | PF3D7_1023<br>900 | PF10_0232  | calcium-<br>transporting<br>ATPase,<br>putative<br>[Plasmodium<br>falciparum<br>3D7]                                | Global                     | GO:0006754 |
| CCS   | copper<br>chaperone<br>for<br>superoxide<br>dismutase | PF3D7_0106<br>300 | PFA0310c   | CD2<br>associated<br>protein                                                                                        | Troph/<br>Gametocytes      |            |
| CD2AP | CD59<br>molecule<br>(CD59 blood<br>group)             | PF3D7_1121<br>300 | PF11_0220  | hypothetical<br>protein                                                                                             | Sporozoites/<br>Merozoites |            |
| CD59  |                                                       | PF3D7_0911<br>300 | PFI0550w   | protein<br>kinase,<br>putative<br>[Plasmodium<br>falciparum<br>3D7]                                                 | Schizont                   | GO:0006468 |
| CDC37 | cell division<br>cycle 37                             | PF3D7_0317<br>200 | PFC0755c   | protein<br>kinase,<br>putative<br>[Plasmodium<br>falciparum<br>3D7]                                                 | Schizont                   | GO:0006468 |
| CDC42 | cell division<br>cycle 42                             | PF3D7_0317<br>200 | PFC0755c   | protein<br>kinase,<br>putative<br>[Plasmodium<br>falciparum<br>3D7]                                                 | Schizont                   | GO:0006468 |
| CDK2  | cyclin<br>dependent<br>kinase 2                       | PF3D7_0309<br>000 | PFC0380w   | dual-<br>specificity<br>protein<br>phosphatase<br>, putative                                                        | Troph/<br>Gametocytes      |            |

Sheet1

|      |                                        |               |           |                                                                                         |                       |            |
|------|----------------------------------------|---------------|-----------|-----------------------------------------------------------------------------------------|-----------------------|------------|
| CDK2 | cyclin dependent kinase 2              | PF3D7_0317200 | PFC0755c  | protein kinase, putative [Plasmodium falciparum 3D7]                                    | Schizont              | GO:0006468 |
| CDK2 | cyclin dependent kinase 2              | PF3D7_1030800 | PF10_0301 | calmodulin, putative [Plasmodium falciparum 3D7]                                        | Global                | GO:0005509 |
| CDK2 | cyclin dependent kinase 2              | PF3D7_1121300 | PF11_0220 | hypothetical protein                                                                    | Troph/<br>Gametocytes |            |
| CDK2 | cyclin dependent kinase 2              | PF3D7_1135100 | PF11_0362 | protein phosphatase, putative [Plasmodium falciparum 3D7]                               | Ring/Schizont         | None       |
| CDK2 | cyclin dependent kinase 2              | PF3D7_1247400 | PFL2275c  | FK506-binding protein (FKBP)-type peptidyl-propyl isomerase [Plasmodium falciparum 3D7] | Troph                 | GO:0006457 |
| CDK2 | cyclin dependent kinase 2              | PF3D7_1342400 | PF13_0232 | casein kinase II beta chain [Plasmodium falciparum 3D7]                                 | Troph                 | GO:0004674 |
| CFTR | CF transmembrane conductance regulator | PF3D7_0302600 | PFC0125w  | ABC transporter, putative                                                               | Gametocytes           |            |
| CFTR | CF transmembrane conductance regulator | PF3D7_1339900 | PF13_0218 |                                                                                         |                       |            |
| CFTR | CF transmembrane conductance regulator | PF3D7_1352100 | PF13_0271 | ABC transporter, (heavy metal transporter family) [Plasmodium falciparum 3D7]           | Global                | GO:0006810 |

Sheet1

|       |                                            |               |             |                                                                               |             |            |
|-------|--------------------------------------------|---------------|-------------|-------------------------------------------------------------------------------|-------------|------------|
| CFTR  | CF transmembrane conductance regulator     | PF3D7_1426500 | PF14_0244   | ABC transporter, putative                                                     | Gametocytes |            |
| CFTR  | CF transmembrane conductance regulator     | PF3D7_1447900 | PF14_0455   |                                                                               |             |            |
| CIAO1 | cytosolic iron-sulfur assembly component 1 | PF3D7_0816000 | PF08_0065   | nucleolar preribosomal assembly protein, putative [Plasmodium falciparum 3D7] | Ring        | None       |
| CIAO1 | cytosolic iron-sulfur assembly component 1 | PF3D7_0909900 | PFI0480w    | helicase with Zn-finger motif, putative [Plasmodium falciparum 3D7]           | Global      | GO:0003676 |
| CIAO1 | cytosolic iron-sulfur assembly component 1 | PF3D7_1036700 | PF10_0359   |                                                                               |             |            |
| CIAO1 | cytosolic iron-sulfur assembly component 1 | PF3D7_1309300 | MAL13P1.45  | U4/U6 small nuclear ribonucleoprotein, putative [Plasmodium falciparum 3D7]   | Global      | GO:0003676 |
| CIRBP | cold inducible RNA binding protein         | PF3D7_0317200 | PFC0755c    | protein kinase, putative [Plasmodium falciparum 3D7]                          | Schizont    | GO:0006468 |
| CIRBP | cold inducible RNA binding protein         | PF3D7_1323400 | PF13_0132   | 60S ribosomal protein L23a, putative [Plasmodium falciparum 3D7]              | Ring        | GO:0006412 |
| CIRBP | cold inducible RNA binding protein         | PF3D7_1367100 | MAL13P1.33E | 60S ribosomal protein L23a, putative [Plasmodium falciparum 3D7]              | Global      | GO:0006396 |

Sheet1

|       |                                          |                   |           |                                                                                                         |                            |            |
|-------|------------------------------------------|-------------------|-----------|---------------------------------------------------------------------------------------------------------|----------------------------|------------|
| COASY | Coenzyme A synthase                      | PF3D7_0520<br>600 | PFE1035c  | BIS(5'-nucleosyl)-tetraphosphatase (Diadenosine tetraphosphatase), putative [Plasmodium falciparum 3D7] | Ring/Troph                 | GO:0004081 |
| COASY | Coenzyme A synthase                      | PF3D7_1443<br>700 | PF14_0415 | dephospho-CoA kinase, putative coatomer alpha subunit, putative [Plasmodium falciparum 3D7]             | Sporozoites/<br>Merozoites |            |
| COPA  | COPI coat complex subunit alpha          | PF3D7_0606<br>700 | PFF0330w  | coat protein, gamma subunit, putative [Plasmodium falciparum 3D7]                                       | Global                     | GO:0006886 |
| COPA  | COPI coat complex subunit alpha          | PF3D7_1145<br>100 | PF11_0463 | coat protein, gamma subunit, putative [Plasmodium falciparum 3D7]                                       | Global                     | GO:0006886 |
| CPNE1 | copine 1                                 | PF3D7_1243<br>900 | PFL2110c  | conserved protein [Plasmodium falciparum 3D7]                                                           |                            |            |
| CPNE3 | copine 3                                 | PF3D7_1243<br>900 | PFL2110c  | conserved protein [Plasmodium falciparum 3D7]                                                           |                            |            |
| CRKL  | CRK like proto-oncogene, adaptor protein | PF3D7_0515<br>300 | PFE0765w  | phosphatidylinositol 3-kinase, putative [Plasmodium falciparum 3D7]                                     | Global                     | GO:0006897 |
| CRKL  | CRK like proto-oncogene, adaptor protein | PF3D7_1121<br>300 | PF11_0220 | hypothetical protein                                                                                    | Troph/<br>Gametocytes      |            |
| CRKL  | CRK like proto-oncogene, adaptor protein | PF3D7_1243<br>900 | PFL2110c  | conserved protein [Plasmodium falciparum 3D7]                                                           |                            |            |

Sheet1

|       |                                     |               |           |                                                                      |                   |            |
|-------|-------------------------------------|---------------|-----------|----------------------------------------------------------------------|-------------------|------------|
| CRK   | CRK proto-oncogene, adaptor protein | PF3D7_0515300 | PFE0765w  | phosphatidylinositol 3-kinase, putative [Plasmodium falciparum 3D7]  | Global            | GO:0006897 |
| CRK   | CRK proto-oncogene, adaptor protein | PF3D7_1121300 | PF11_0220 | hypothetical protein                                                 | Troph/Gametocytes |            |
| CRK   | CRK proto-oncogene, adaptor protein | PF3D7_1243900 | PFL2110c  | conserved protein [Plasmodium falciparum 3D7]                        |                   |            |
| CRNN  | cornulin                            | PF3D7_1243900 | PFL2110c  | conserved protein [Plasmodium falciparum 3D7]                        |                   |            |
| CUL1  | cullin 1                            | PF3D7_0629800 | PFF1445c  | cullin-like protein, putative [Plasmodium falciparum 3D7]            | Unknown           | GO:0000082 |
| CUL4A | cullin 4A                           | PF3D7_0629800 | PFF1445c  | cullin-like protein, putative [Plasmodium falciparum 3D7]            | Unknown           | GO:0000082 |
| CUL4B | cullin 4B                           | PF3D7_0629800 | PFF1445c  | cullin-like protein, putative [Plasmodium falciparum 3D7]            | Unknown           | GO:0000082 |
| DBNL  | drebrin like                        | PF3D7_0823300 | PF08_0034 | histone acetyltransferase GCN5, putative [Plasmodium falciparum 3D7] | Global            | GO:0006355 |
| DBNL  | drebrin like                        | PF3D7_1121300 | PF11_0220 | hypothetical protein                                                 | Troph/Gametocytes |            |
| DDHD2 | DDHD domain containing 2            | PF3D7_0317200 | PFC0755c  | protein kinase, putative [Plasmodium falciparum 3D7]                 | Schizont          | GO:0006468 |

Sheet1

|       |                                  |               |             |                                                                       |             |            |
|-------|----------------------------------|---------------|-------------|-----------------------------------------------------------------------|-------------|------------|
| DDI2  | DNA damage inducible 1 homolog 2 | PF3D7_0317200 | PFC0755c    | protein kinase, putative [Plasmodium falciparum 3D7]                  | Schizont    | GO:0006468 |
| DDX17 | DEAD-box helicase 17             | PF3D7_0215700 | PF02_0148   |                                                                       |             |            |
| DDX17 | DEAD-box helicase 17             | PF3D7_0909900 | PFI0480w    | helicase with Zn-finger motif, putative [Plasmodium falciparum 3D7]   | Global      | GO:0003676 |
| DDX17 | DEAD-box helicase 17             | PF3D7_1239500 | PFL1915w    |                                                                       |             |            |
| DDX17 | DEAD-box helicase 17             | PF3D7_1302700 | MAL13P1.14  | ATP dependent DEAD-box helicase, putative [Plasmodium falciparum 3D7] | Global      | GO:0003676 |
| DDX17 | DEAD-box helicase 17             | PF3D7_1313400 | PF13_0077   | DEAD box helicase, putative                                           | Gametocytes |            |
| DDX17 | DEAD-box helicase 17             | PF3D7_1324500 | MAL13P1.134 |                                                                       |             |            |
| DDX17 | DEAD-box helicase 17             | PF3D7_1408400 | PF14_0081   | DNA repair helicase, putative                                         | Merozoites  |            |
| DDX27 | DEAD-box helicase 27             | PF3D7_0215700 | PF02_0148   |                                                                       |             |            |
| DDX3X | DEAD-box helicase 3 X-linked     | PF3D7_0215700 | PF02_0148   |                                                                       |             |            |
| DDX3X | DEAD-box helicase 3 X-linked     | PF3D7_0909900 | PFI0480w    | helicase with Zn-finger motif, putative [Plasmodium falciparum 3D7]   | Global      | GO:0003676 |
| DDX3X | DEAD-box helicase 3 X-linked     | PF3D7_1313400 | PF13_0077   | DEAD box helicase, putative                                           | Gametocytes |            |
| DGKA  | diacylglycerol kinase alpha      | PF3D7_0317200 | PFC0755c    | protein kinase, putative [Plasmodium falciparum 3D7]                  | Schizont    | GO:0006468 |

Sheet1

|       |                                       |               |             |                                                                       |             |            |
|-------|---------------------------------------|---------------|-------------|-----------------------------------------------------------------------|-------------|------------|
| DGKA  | diacylglycerol kinase alpha           | PF3D7_1243900 | PFL2110c    | conserved protein [Plasmodium falciparum 3D7]                         |             |            |
| DHX15 | DEAH-box helicase 15                  | PF3D7_0215700 | PF02_0148   |                                                                       |             |            |
| DHX15 | DEAH-box helicase 15                  | PF3D7_0909900 | PFI0480w    | helicase with Zn-finger motif, putative [Plasmodium falciparum 3D7]   | Global      | GO:0003676 |
| DHX15 | DEAH-box helicase 15                  | PF3D7_1313400 | PF13_0077   | DEAD box helicase, putative                                           | Gametocytes |            |
| DHX9  | DExH-box helicase 9                   | PF3D7_0215700 | PF02_0148   |                                                                       |             |            |
| DHX9  | DExH-box helicase 9                   | PF3D7_0909900 | PFI0480w    | helicase with Zn-finger motif, putative [Plasmodium falciparum 3D7]   | Global      | GO:0003676 |
| DHX9  | DExH-box helicase 9                   | PF3D7_1239500 | PFL1915w    |                                                                       |             |            |
| DHX9  | DExH-box helicase 9                   | PF3D7_1302700 | MAL13P1.14  | ATP dependent DEAD-box helicase, putative [Plasmodium falciparum 3D7] | Global      | GO:0003676 |
| DHX9  | DExH-box helicase 9                   | PF3D7_1313400 | PF13_0077   | DEAD box helicase, putative                                           | Gametocytes |            |
| DIP2B | disco interacting protein 2 homolog B | PF3D7_0627800 | PFF1350c    |                                                                       |             |            |
| DOHH  | deoxyhypusine hydroxylase             | PF3D7_0317200 | PFC0755c    | protein kinase, putative [Plasmodium falciparum 3D7]                  | Schizont    | GO:0006468 |
| DOHH  | deoxyhypusine hydroxylase             | PF3D7_1338100 | MAL13P1.19C | proteasome regulatory component, putative [Plasmodium falciparum 3D7] | Global      | GO:0006511 |

Sheet1

|       |                                                                  |                   |             |                                                                                                       |          |            |
|-------|------------------------------------------------------------------|-------------------|-------------|-------------------------------------------------------------------------------------------------------|----------|------------|
| DPP9  | dipeptidyl<br>peptidase 9                                        | PF3D7_0321<br>500 | PFC0950c    | peptidase,<br>putative<br>[Plasmodium<br>falciparum<br>3D7]                                           | Troph    | GO:0006508 |
| DRG2  | development<br>ally regulated<br>GTP binding<br>protein 2        | PF3D7_0524<br>400 | PFE1215c    | cytosolic<br>preribosomal<br>GTP-binding<br>protein,<br>putative<br>[Plasmodium<br>falciparum<br>3D7] | Ring     | GO:0005525 |
| DRG2  | development<br>ally regulated<br>GTP binding<br>protein 2        | PF3D7_0824<br>300 | MAL8P1.33   |                                                                                                       |          |            |
| DRG2  | development<br>ally regulated<br>GTP binding<br>protein 2        | PF3D7_1358<br>900 | MAL13P1.294 | GTP binding<br>protein,<br>putative<br>[Plasmodium<br>falciparum<br>3D7]                              | Global   | GO:0007165 |
| EIF3F | eukaryotic<br>translation<br>initiation<br>factor 3<br>subunit F | PF3D7_0612<br>100 | PFF0590c    | homologue<br>of human<br>HSPC025<br>[Plasmodium<br>falciparum<br>3D7]                                 | Unknown  | None       |
| EIF3F | eukaryotic<br>translation<br>initiation<br>factor 3<br>subunit F | PF3D7_1338<br>100 | MAL13P1.19C | proteasome<br>regulatory<br>component,<br>putative<br>[Plasmodium<br>falciparum<br>3D7]               | Global   | GO:0006511 |
| EIF3G | eukaryotic<br>translation<br>initiation<br>factor 3<br>subunit G | PF3D7_0317<br>200 | PFC0755c    | protein<br>kinase,<br>putative<br>[Plasmodium<br>falciparum<br>3D7]                                   | Schizont | GO:0006468 |
| EIF3G | eukaryotic<br>translation<br>initiation<br>factor 3<br>subunit G | PF3D7_1323<br>400 | PF13_0132   | 60S<br>ribosomal<br>protein L23a,<br>putative<br>[Plasmodium<br>falciparum<br>3D7]                    | Ring     | GO:0006412 |
| EIF3G | eukaryotic<br>translation<br>initiation<br>factor 3<br>subunit G | PF3D7_1329<br>300 | PF13_0149   | chromatin<br>assembly<br>factor 1<br>subunit,<br>putative<br>[Plasmodium<br>falciparum<br>3D7]        | Global   | GO:0006333 |



Sheet1

|       |                                                      |               |                 |                                                                           |          |            |
|-------|------------------------------------------------------|---------------|-----------------|---------------------------------------------------------------------------|----------|------------|
| EIF3G | eukaryotic translation initiation factor 3 subunit G | PF3D7_1367100 | MAL13P1.33E3D7] | U1 small nuclear ribonucleoprotein, putative [Plasmodium falciparum       | Global   | GO:0006396 |
| EIF3I | eukaryotic translation initiation factor 3 subunit I | PF3D7_1036700 | PF10_0359       |                                                                           |          |            |
| EIF3I | eukaryotic translation initiation factor 3 subunit I | PF3D7_1329300 | PF13_0149       | chromatin assembly factor 1 subunit, putative [Plasmodium falciparum 3D7] | Global   | GO:0006333 |
| EIF3K | eukaryotic translation initiation factor 3 subunit K | PF3D7_0612100 | PFF0590c        | homologue of human HSPC025 [Plasmodium falciparum 3D7]                    | Unknown  | None       |
| EIF3K | eukaryotic translation initiation factor 3 subunit K | PF3D7_1338100 | MAL13P1.19C3D7] | proteasome regulatory component, putative [Plasmodium falciparum 3D7]     | Global   | GO:0006511 |
| EIF3M | eukaryotic translation initiation factor 3 subunit M | PF3D7_0612100 | PFF0590c        | homologue of human HSPC025 [Plasmodium falciparum 3D7]                    | Unknown  | None       |
| EIF3M | eukaryotic translation initiation factor 3 subunit M | PF3D7_1338100 | MAL13P1.19C3D7] | proteasome regulatory component, putative [Plasmodium falciparum 3D7]     | Global   | GO:0006511 |
| FADD  | Fas associated via death domain                      | PF3D7_0317200 | PFC0755c        | protein kinase, putative [Plasmodium falciparum 3D7]                      | Schizont | GO:0006468 |
| FKBP2 | FKBP prolyl isomerase 2                              | PF3D7_0317200 | PFC0755c        | protein kinase, putative [Plasmodium falciparum 3D7]                      | Schizont | GO:0006468 |

Sheet1

|       |                         |               |           |                                                                                         |                       |            |
|-------|-------------------------|---------------|-----------|-----------------------------------------------------------------------------------------|-----------------------|------------|
| FKBP2 | FKBP prolyl isomerase 2 | PF3D7_1121300 | PF11_0220 | hypothetical protein                                                                    | Troph/<br>Gametocytes |            |
| FKBP2 | FKBP prolyl isomerase 2 | PF3D7_1247400 | PFL2275c  | FK506-binding protein (FKBP)-type peptidyl-propyl isomerase [Plasmodium falciparum 3D7] | Troph                 | GO:0006457 |
| FKBP3 | FKBP prolyl isomerase 3 | PF3D7_0317200 | PFC0755c  | protein kinase, putative [Plasmodium falciparum 3D7]                                    | Schizont              | GO:0006468 |
| FKBP3 | FKBP prolyl isomerase 3 | PF3D7_1121300 | PF11_0220 | hypothetical protein                                                                    | Troph/<br>Gametocytes |            |
| FKBP3 | FKBP prolyl isomerase 3 | PF3D7_1247400 | PFL2275c  | FK506-binding protein (FKBP)-type peptidyl-propyl isomerase [Plasmodium falciparum 3D7] | Troph                 | GO:0006457 |
| FKBP4 | FKBP prolyl isomerase 4 | PF3D7_0317200 | PFC0755c  | protein kinase, putative [Plasmodium falciparum 3D7]                                    | Schizont              | GO:0006468 |
| FKBP4 | FKBP prolyl isomerase 4 | PF3D7_1121300 | PF11_0220 | hypothetical protein                                                                    | Troph/<br>Gametocytes |            |
| FKBP4 | FKBP prolyl isomerase 4 | PF3D7_1247400 | PFL2275c  | FK506-binding protein (FKBP)-type peptidyl-propyl isomerase [Plasmodium falciparum 3D7] | Troph                 | GO:0006457 |
| FKBP5 | FKBP prolyl isomerase 5 | PF3D7_0317200 | PFC0755c  | protein kinase, putative [Plasmodium falciparum 3D7]                                    | Schizont              | GO:0006468 |
| FKBP5 | FKBP prolyl isomerase 5 | PF3D7_1121300 | PF11_0220 | hypothetical protein                                                                    | Troph/<br>Gametocytes |            |

Sheet1

|       |                                        |                   |             |                                                                                         |                       |            |
|-------|----------------------------------------|-------------------|-------------|-----------------------------------------------------------------------------------------|-----------------------|------------|
| FKBP5 | FKBP prolyl isomerase 5                | PF3D7_1247<br>400 | PFL2275c    | FK506-binding protein (FKBP)-type peptidyl-propyl isomerase [Plasmodium falciparum 3D7] | Troph                 | GO:0006457 |
| FLNA  | filamin A                              | PF3D7_1121<br>300 | PF11_0220   | hypothetical protein                                                                    | Troph/<br>Gametocytes |            |
| FLNB  | filamin B                              | PF3D7_1121<br>300 | PF11_0220   | hypothetical protein                                                                    | Troph/<br>Gametocytes |            |
| FLNC  | filamin C                              | PF3D7_1121<br>300 | PF11_0220   | hypothetical protein                                                                    | Troph/<br>Gametocytes |            |
| FUBP1 | far upstream element binding protein 1 | PF3D7_0605<br>100 | PFF0250w    | RNA binding protein, putative [Plasmodium falciparum 3D7]                               | Global                | GO:0003723 |
| G3BP1 | G3BP stress granule assembly factor 1  | PF3D7_0317<br>200 | PFC0755c    | protein kinase, putative [Plasmodium falciparum 3D7]                                    | Schizont              | GO:0006468 |
| G3BP2 | G3BP stress granule assembly factor 2  | PF3D7_0317<br>200 | PFC0755c    | protein kinase, putative [Plasmodium falciparum 3D7]                                    | Schizont              | GO:0006468 |
| GAB1  | GRB2 associated binding protein 1      | PF3D7_0317<br>200 | PFC0755c    | protein kinase, putative [Plasmodium falciparum 3D7]                                    | Schizont              | GO:0006468 |
| GAB1  | GRB2 associated binding protein 1      | PF3D7_1121<br>300 | PF11_0220   | hypothetical protein                                                                    | Troph/<br>Gametocytes |            |
| GAB1  | GRB2 associated binding protein 1      | PF3D7_1329<br>300 | PF13_0149   | chromatin assembly factor 1 subunit, putative [Plasmodium falciparum 3D7]               | Global                | GO:0006333 |
| GAB1  | GRB2 associated binding protein 1      | PF3D7_1359<br>800 | MAL13P1.297 |                                                                                         |                       |            |

Sheet1

|       |                                                                       |                   |             |                                                                                          |                       |            |
|-------|-----------------------------------------------------------------------|-------------------|-------------|------------------------------------------------------------------------------------------|-----------------------|------------|
| GAK   | cyclin G associated kinase                                            | PF3D7_1342<br>400 | PF13_0232   | casein kinase II beta chain [Plasmodium falciparum 3D7]                                  | Troph                 | GO:0004674 |
| GGA3  | golgi associated, gamma adaptin ear containing, ARF binding protein 3 | PF3D7_1359<br>800 | MAL13P1.297 |                                                                                          |                       |            |
| GLRX3 | glutaredoxin 3                                                        | PF3D7_1411<br>400 | PF14_0112   |                                                                                          |                       |            |
| GMDS  | GDP-mannose 4,6-dehydratase                                           | PF3D7_0813<br>800 | PF08_0077   |                                                                                          |                       |            |
| GMFB  | glia maturation factor beta                                           | PF3D7_0823<br>300 | PF08_0034   | histone acetyltransferase GCN5, putative [Plasmodium falciparum 3D7]                     | Global                | GO:0006355 |
| GMFB  | glia maturation factor beta                                           | PF3D7_1121<br>300 | PF11_0220   | hypothetical protein                                                                     | Troph/<br>Gametocytes |            |
| GMFG  | glia maturation factor gamma                                          | PF3D7_0823<br>300 | PF08_0034   | histone acetyltransferase GCN5, putative [Plasmodium falciparum 3D7]                     | Global                | GO:0006355 |
| GMFG  | glia maturation factor gamma                                          | PF3D7_1121<br>300 | PF11_0220   | hypothetical protein                                                                     | Troph/<br>Gametocytes |            |
| GMPPA | GDP-mannose pyrophosphorylase A                                       | PF3D7_0828<br>500 | PF08_0009   | translation initiation factor EIF-2b alpha subunit, putative [Plasmodium falciparum 3D7] | Global                | GO:0006413 |
| GMPPB | GDP-mannose pyrophosphorylase B                                       | PF3D7_0828<br>500 | PF08_0009   | translation initiation factor EIF-2b alpha subunit, putative [Plasmodium falciparum 3D7] | Global                | GO:0006413 |

Sheet1

|       |                                                                         |               |           |                                                                           |                       |            |
|-------|-------------------------------------------------------------------------|---------------|-----------|---------------------------------------------------------------------------|-----------------------|------------|
| GNA13 | G protein subunit alpha 13                                              | PF3D7_1329300 | PF13_0149 | chromatin assembly factor 1 subunit, putative [Plasmodium falciparum 3D7] | Global                | GO:0006333 |
| GNA14 | G protein subunit alpha 14                                              | PF3D7_1329300 | PF13_0149 | chromatin assembly factor 1 subunit, putative [Plasmodium falciparum 3D7] | Global                | GO:0006333 |
| GNAI3 | G protein subunit alpha i3                                              | PF3D7_1329300 | PF13_0149 | chromatin assembly factor 1 subunit, putative [Plasmodium falciparum 3D7] | Global                | GO:0006333 |
| GNAQ  | G protein subunit alpha q                                               | PF3D7_1329300 | PF13_0149 | chromatin assembly factor 1 subunit, putative [Plasmodium falciparum 3D7] | Global                | GO:0006333 |
| GSTT1 | glutathione S-transferase theta 1                                       | PF3D7_1338300 | PF13_0214 | elongation factor 1-gamma, putative [Plasmodium falciparum 3D7]           | Troph                 | GO:0006414 |
| HACE1 | HECT domain and ankyrin repeat containing E3 ubiquitin protein ligase 1 | PF3D7_0309000 | PFC0380w  | dual-specificity protein phosphatase , putative                           | Troph/<br>Gametocytes |            |
| HACE1 | HECT domain and ankyrin repeat containing E3 ubiquitin protein ligase 1 | PF3D7_0317200 | PFC0755c  | protein kinase, putative [Plasmodium falciparum 3D7]                      | Schizont              | GO:0006468 |

Sheet1

|       |                                                                         |                   |             |                                                                                                       |                   |            |
|-------|-------------------------------------------------------------------------|-------------------|-------------|-------------------------------------------------------------------------------------------------------|-------------------|------------|
| HACE1 | HECT domain and ankyrin repeat containing E3 ubiquitin protein ligase 1 | PF3D7_0528<br>500 | PFE1420w    |                                                                                                       |                   |            |
| HACE1 | HECT domain and ankyrin repeat containing E3 ubiquitin protein ligase 1 | PF3D7_1247<br>800 | PFL2290w    | preprocathepsin c precursor, putative                                                                 | Troph/Gametocytes |            |
| HACE1 | HECT domain and ankyrin repeat containing E3 ubiquitin protein ligase 1 | PF3D7_1359<br>800 | MAL13P1.297 |                                                                                                       |                   |            |
| HBB   | hemoglobin subunit beta                                                 | PF3D7_0623<br>200 | PFF1115w    |                                                                                                       |                   |            |
| HBD   | hypophosphatemic bone disease                                           | PF3D7_0623<br>200 | PFF1115w    |                                                                                                       |                   |            |
| HBG1  | hemoglobin subunit gamma 1                                              | PF3D7_0623<br>200 | PFF1115w    |                                                                                                       |                   |            |
| HBM   | hemoglobin subunit mu                                                   | PF3D7_0623<br>200 | PFF1115w    |                                                                                                       |                   |            |
| HBS1L | HBS1 like translational GTPase                                          | PF3D7_0212<br>300 | PF02_0115   |                                                                                                       |                   |            |
| HBS1L | HBS1 like translational GTPase                                          | PF3D7_0516<br>600 | PFE0830c    | unknown protein, mb2 cytosolic preribosomal GTP-binding protein, putative [Plasmodium falciparum 3D7] | Merozoites        |            |
| HBS1L | HBS1 like translational GTPase                                          | PF3D7_0524<br>400 | PFE1215c    |                                                                                                       | Ring              | GO:0005525 |
| HBS1L | HBS1 like translational GTPase                                          | PF3D7_0602<br>400 | PFF0115c    |                                                                                                       |                   |            |

Sheet1

|       |                                             |               |             |                                                                                                |                       |            |
|-------|---------------------------------------------|---------------|-------------|------------------------------------------------------------------------------------------------|-----------------------|------------|
| HBS1L | HBS1 like translational GTPase              | PF3D7_1123400 | PF11_0245   | translation elongation factor EF-1, subunit alpha, putative [Plasmodium falciparum 3D7]        | Ring/Troph            | GO:0006414 |
| HBS1L | HBS1 like translational GTPase              | PF3D7_1233000 | PFL1590c    | elongation factor G, putative [Plasmodium falciparum 3D7]                                      | Troph                 | GO:0006414 |
| HBS1L | HBS1 like translational GTPase              | PF3D7_1358900 | MAL13P1.294 | GTP binding protein, putative [Plasmodium falciparum 3D7]                                      | Global                | GO:0007165 |
| HBS1L | HBS1 like translational GTPase              | PF3D7_1410600 | PF14_0104   | eukaryotic translation initiation factor 2 gamma subunit, putative [Plasmodium falciparum 3D7] | Global                | GO:0006413 |
| HCLS1 | hematopoietic cell-specific Lyn substrate 1 | PF3D7_1121300 | PF11_0220   | hypothetical protein                                                                           | Troph/<br>Gametocytes |            |
| HDAC6 | histone deacetylase 6                       | PF3D7_0602400 | PFF0115c    |                                                                                                |                       |            |
| HELLS | helicase, lymphoid specific                 | PF3D7_0215700 | PF02_0148   |                                                                                                |                       |            |
| HELLS | helicase, lymphoid specific                 | PF3D7_1023900 | PF10_0232   | Chromodomain-helicase-DNA-binding protein 1 homolog, putative [Plasmodium falciparum 3D7]      | Global                | GO:0006333 |
| HELLS | helicase, lymphoid specific                 | PF3D7_1302700 | MAL13P1.14  | ATP dependent DEAD-box helicase, putative [Plasmodium falciparum 3D7]                          | Global                | GO:0003676 |

Sheet1

|       |                                                                                     |                   |                 |                                                                                               |             |            |
|-------|-------------------------------------------------------------------------------------|-------------------|-----------------|-----------------------------------------------------------------------------------------------|-------------|------------|
| HELLS | helicase,<br>lymphoid<br>specific                                                   | PF3D7_1313<br>400 | PF13_0077       | DEAD box<br>helicase,<br>putative                                                             | Gametocytes |            |
| HNRPD |                                                                                     | PF3D7_0317<br>200 | PFC0755c        | protein<br>kinase,<br>putative<br>[Plasmodium<br>falciparum<br>3D7]                           | Schizont    | GO:0006468 |
| HNRPD |                                                                                     | PF3D7_1367<br>100 | MAL13P1.33E3D7] | nuclear<br>ribonucleopr<br>otein,<br>putative<br>[Plasmodium<br>falciparum<br>3D7]            | Global      | GO:0006396 |
| HNRPK |                                                                                     | PF3D7_0605<br>100 | PFF0250w        | RNA binding<br>protein,<br>putative<br>[Plasmodium<br>falciparum<br>3D7]                      | Global      | GO:0003723 |
| HSPB1 | heat shock<br>protein family<br>B (small)<br>member 1                               | PF3D7_0816<br>500 | MAL8P1.78       | small heat<br>shock protein                                                                   | Merozoites  |            |
| HUWE1 | HECT, UBA<br>and WWE<br>domain<br>containing<br>E3 ubiquitin<br>protein ligase<br>1 | PF3D7_0317<br>200 | PFC0755c        | protein<br>kinase,<br>putative<br>[Plasmodium<br>falciparum<br>3D7]                           | Schizont    | GO:0006468 |
| ICAM4 | intercellular<br>adhesion<br>molecule 4<br>(Landsteiner-<br>Wiener blood<br>group)  | PF3D7_0616<br>500 | PFF0800w        |                                                                                               |             |            |
| IFIT5 | interferon<br>induced<br>protein with<br>tetratricopept<br>ide repeats 5            | PF3D7_0631<br>000 | PFF1505w        | TPR-like<br>domain<br>containing<br>protein,<br>putative<br>[Plasmodium<br>falciparum<br>3D7] |             |            |
| IGHG1 | immunoglob<br>ulin heavy<br>constant<br>gamma 1<br>(G1m<br>marker)                  | PF3D7_0616<br>500 | PFF0800w        |                                                                                               |             |            |
| IGHM  | immunoglob<br>ulin heavy<br>constant mu                                             | PF3D7_0616<br>500 | PFF0800w        |                                                                                               |             |            |



Sheet1

|       |                                                       |                   |             |                                                                                         |                       |            |
|-------|-------------------------------------------------------|-------------------|-------------|-----------------------------------------------------------------------------------------|-----------------------|------------|
| IRAK4 | interleukin 1 receptor associated kinase 4            | PF3D7_0317<br>200 | PFC0755c    | protein kinase, putative [Plasmodium falciparum 3D7]                                    | Schizont              | GO:0006468 |
| IRAK4 | interleukin 1 receptor associated kinase 4            | PF3D7_1121<br>300 | PF11_0220   | hypothetical protein                                                                    | Troph/<br>Gametocytes |            |
| IRAK4 | interleukin 1 receptor associated kinase 4            | PF3D7_1247<br>400 | PFL2275c    | FK506-binding protein (FKBP)-type peptidyl-propyl isomerase [Plasmodium falciparum 3D7] | Troph                 | GO:0006457 |
| ITSN1 | intersectin 1                                         | PF3D7_1121<br>300 | PF11_0220   | hypothetical protein                                                                    | Troph/<br>Gametocytes |            |
| ITSN1 | intersectin 1                                         | PF3D7_1243<br>900 | PFL2110c    | conserved protein [Plasmodium falciparum 3D7]                                           |                       |            |
| KALRN | kalirin RhoGEF kinase                                 | PF3D7_0317<br>200 | PFC0755c    | protein kinase, putative [Plasmodium falciparum 3D7]                                    | Schizont              | GO:0006468 |
| KALRN | kalirin RhoGEF kinase                                 | PF3D7_1135<br>100 | PF11_0362   | protein phosphatase, putative [Plasmodium falciparum 3D7]                               | Ring/Schizont         | None       |
| KALRN | kalirin RhoGEF kinase                                 | PF3D7_1247<br>400 | PFL2275c    | FK506-binding protein (FKBP)-type peptidyl-propyl isomerase [Plasmodium falciparum 3D7] | Troph                 | GO:0006457 |
| KALRN | kalirin RhoGEF kinase                                 | PF3D7_1359<br>800 | MAL13P1.297 |                                                                                         |                       |            |
| KCTD7 | potassium channel tetramerization domain containing 7 | PF3D7_1238<br>700 | PFL1875w    | conserved Plasmodium protein [Plasmodium falciparum 3D7]                                | Unknown               | GO:0006813 |

Sheet1

|       |                                                                    |               |                |                                                                      |                        |            |  |
|-------|--------------------------------------------------------------------|---------------|----------------|----------------------------------------------------------------------|------------------------|------------|--|
| LASP1 | LIM and SH3 protein 1                                              | PF3D7_1121300 | PF11_0220      | hypothetical protein                                                 | Troph/Gametocytes      |            |  |
| LDHA  | lactate dehydrogenase A                                            | PF3D7_1325200 | PF13_0144      | oxidoreductase, putative                                             | Merozoites/Gametocytes |            |  |
| LDHB  | lactate dehydrogenase B                                            | PF3D7_1325200 | PF13_0144      | oxidoreductase, putative                                             | Merozoites/Gametocytes |            |  |
| LSM1  | LSM1 homolog, mRNA degradation associated                          | PF3D7_1309300 | MAL13P1.45327  | nuclear ribonucleoprotein, putative [Plasmodium falciparum U6 small] | Global                 | GO:0003676 |  |
| LSM1  | LSM1 homolog, mRNA degradation associated                          | PF3D7_1367100 | MAL13P1.338327 | nuclear ribonucleoprotein, putative [Plasmodium falciparum U6 small] | Global                 | GO:0006396 |  |
| LSM2  | LSM2 homolog, U6 small nuclear RNA and mRNA degradation associated | PF3D7_1309300 | MAL13P1.45327  | nuclear ribonucleoprotein, putative [Plasmodium falciparum U6 small] | Global                 | GO:0003676 |  |
| LSM2  | LSM2 homolog, U6 small nuclear RNA and mRNA degradation associated | PF3D7_1367100 | MAL13P1.338327 | nuclear ribonucleoprotein, putative [Plasmodium falciparum U6 small] | Global                 | GO:0006396 |  |
| LSM3  | LSM3 homolog, U6 small nuclear RNA and mRNA degradation associated | PF3D7_1309300 | MAL13P1.45327  | nuclear ribonucleoprotein, putative [Plasmodium falciparum U6 small] | Global                 | GO:0003676 |  |
| LSM4  | LSM4 homolog, U6 small nuclear RNA and mRNA degradation associated | PF3D7_1309300 | MAL13P1.45327  | nuclear ribonucleoprotein, putative [Plasmodium falciparum U6 small] | Global                 | GO:0003676 |  |
| LSM4  | LSM4 homolog, U6 small nuclear RNA and mRNA degradation associated | PF3D7_1367100 | MAL13P1.338327 | nuclear ribonucleoprotein, putative [Plasmodium falciparum U6 small] | Global                 | GO:0006396 |  |

Sheet1

|       |                                                                    |               |                |                                                                      |                   |            |
|-------|--------------------------------------------------------------------|---------------|----------------|----------------------------------------------------------------------|-------------------|------------|
| LSM5  | LSM5 homolog, U6 small nuclear RNA and mRNA degradation associated | PF3D7_1367100 | MAL13P1.3383D7 | U1 small nuclear ribonucleoprotein, putative [Plasmodium falciparum] | Global            | GO:0006396 |
| LSM6  | LSM6 homolog, U6 small nuclear RNA and mRNA degradation associated | PF3D7_1309300 | MAL13P1.453D7  | U1 small nuclear ribonucleoprotein, putative [Plasmodium falciparum] | Global            | GO:0003676 |
| LSM6  | LSM6 homolog, U6 small nuclear RNA and mRNA degradation associated | PF3D7_1367100 | MAL13P1.3383D7 | U1 small nuclear ribonucleoprotein, putative [Plasmodium falciparum] | Global            | GO:0006396 |
| LSM7  | LSM7 homolog, U6 small nuclear RNA and mRNA degradation associated | PF3D7_1367100 | MAL13P1.3383D7 | U1 small nuclear ribonucleoprotein, putative [Plasmodium falciparum] | Global            | GO:0006396 |
| LSM8  | LSM8 homolog, U6 small nuclear RNA associated                      | PF3D7_1309300 | MAL13P1.453D7  | U1 small nuclear ribonucleoprotein, putative [Plasmodium falciparum] | Global            | GO:0003676 |
| LSM8  | LSM8 homolog, U6 small nuclear RNA associated                      | PF3D7_1367100 | MAL13P1.3383D7 | U1 small nuclear ribonucleoprotein, putative [Plasmodium falciparum] | Global            | GO:0006396 |
| MARK3 | microtubule affinity regulating kinase 3                           | PF3D7_0309000 | PFC0380w       | dual-specificity protein phosphatase, putative                       | Troph/Gametocytes |            |
| MARK3 | microtubule affinity regulating kinase 3                           | PF3D7_0317200 | PFC0755c       | protein kinase, putative [Plasmodium falciparum]                     | Schizont          | GO:0006468 |
| MARK3 | microtubule affinity regulating kinase 3                           | PF3D7_1121300 | PF11_0220      | hypothetical protein                                                 | Troph/Gametocytes |            |

Sheet1

|       |                                                   |                   |           |                                                                                                                      |                       |            |
|-------|---------------------------------------------------|-------------------|-----------|----------------------------------------------------------------------------------------------------------------------|-----------------------|------------|
| MARK3 | microtubule<br>affinity<br>regulating<br>kinase 3 | PF3D7_1135<br>100 | PF11_0362 | protein<br>phosphatase<br>, putative<br>[Plasmodium<br>falciparum<br>3D7]                                            | Ring/Schizont         | None       |
| MARK3 | microtubule<br>affinity<br>regulating<br>kinase 3 | PF3D7_1247<br>400 | PFL2275c  | FK506-<br>binding<br>protein<br>(FKBP)-type<br>peptidyl-<br>propyl<br>isomerase<br>[Plasmodium<br>falciparum<br>3D7] | Troph                 | GO:0006457 |
| MARK3 | microtubule<br>affinity<br>regulating<br>kinase 3 | PF3D7_1342<br>400 | PF13_0232 | casein<br>kinase II beta<br>chain<br>[Plasmodium<br>falciparum<br>3D7]                                               | Troph                 | GO:0004674 |
| MERTK | MER proto-<br>oncogene,<br>tyrosine<br>kinase     | PF3D7_0309<br>000 | PFC0380w  | dual-<br>specificity<br>protein<br>phosphatase<br>, putative                                                         | Troph/<br>Gametocytes |            |
| MERTK | MER proto-<br>oncogene,<br>tyrosine<br>kinase     | PF3D7_0317<br>200 | PFC0755c  | protein<br>kinase,<br>putative<br>[Plasmodium<br>falciparum<br>3D7]                                                  | Schizont              | GO:0006468 |
| MERTK | MER proto-<br>oncogene,<br>tyrosine<br>kinase     | PF3D7_1121<br>300 | PF11_0220 | hypothetical<br>protein                                                                                              | Troph/<br>Gametocytes |            |
| MERTK | MER proto-<br>oncogene,<br>tyrosine<br>kinase     | PF3D7_1247<br>400 | PFL2275c  | FK506-<br>binding<br>protein<br>(FKBP)-type<br>peptidyl-<br>propyl<br>isomerase<br>[Plasmodium<br>falciparum<br>3D7] | Troph                 | GO:0006457 |
| MERTK | MER proto-<br>oncogene,<br>tyrosine<br>kinase     | PF3D7_1329<br>300 | PF13_0149 | chromatin<br>assembly<br>factor 1<br>subunit,<br>putative<br>[Plasmodium<br>falciparum<br>3D7]                       | Global                | GO:0006333 |

Sheet1

|      |                                                                          |                   |             |                                                                                  |                       |            |
|------|--------------------------------------------------------------------------|-------------------|-------------|----------------------------------------------------------------------------------|-----------------------|------------|
| MIB1 | mindbomb<br>E3 ubiquitin<br>protein ligase<br>1                          | PF3D7_0309<br>000 | PFC0380w    | dual-<br>specificity<br>protein<br>phosphatase<br>, putative                     | Troph/<br>Gametocytes |            |
| MIB1 | mindbomb<br>E3 ubiquitin<br>protein ligase<br>1                          | PF3D7_0317<br>200 | PFC0755c    | protein<br>kinase,<br>putative<br>[Plasmodium<br>falciparum<br>3D7]              | Schizont              | GO:0006468 |
| MIB1 | mindbomb<br>E3 ubiquitin<br>protein ligase<br>1                          | PF3D7_0528<br>500 | PFE1420w    |                                                                                  |                       |            |
| MIB1 | mindbomb<br>E3 ubiquitin<br>protein ligase<br>1                          | PF3D7_1247<br>800 | PFL2290w    | preprocathep<br>sin c<br>precursor,<br>putative                                  | Troph/<br>Gametocytes |            |
| MIB1 | mindbomb<br>E3 ubiquitin<br>protein ligase<br>1                          | PF3D7_1358<br>000 | MAL13P1.285 | patatin-like<br>phospholipas<br>e, putative<br>[Plasmodium<br>falciparum<br>3D7] | Global                | GO:0006629 |
| MIB1 | mindbomb<br>E3 ubiquitin<br>protein ligase<br>1                          | PF3D7_1359<br>800 | MAL13P1.297 |                                                                                  |                       |            |
| MON2 | MON2<br>homolog,<br>regulator of<br>endosome-<br>to-Golgi<br>trafficking | PF3D7_1359<br>800 | MAL13P1.297 |                                                                                  |                       |            |
| MOS  | MOS proto-<br>oncogene,<br>serine/threon<br>ine kinase                   | PF3D7_0309<br>000 | PFC0380w    | dual-<br>specificity<br>protein<br>phosphatase<br>, putative                     | Troph/<br>Gametocytes |            |
| MOS  | MOS proto-<br>oncogene,<br>serine/threon<br>ine kinase                   | PF3D7_0317<br>200 | PFC0755c    | protein<br>kinase,<br>putative<br>[Plasmodium<br>falciparum<br>3D7]              | Schizont              | GO:0006468 |
| MOS  | MOS proto-<br>oncogene,<br>serine/threon<br>ine kinase                   | PF3D7_1121<br>300 | PF11_0220   | hypothetical<br>protein                                                          | Troph/<br>Gametocytes |            |
| MOS  | MOS proto-<br>oncogene,<br>serine/threon<br>ine kinase                   | PF3D7_1135<br>100 | PF11_0362   | protein<br>phosphatase<br>, putative<br>[Plasmodium<br>falciparum<br>3D7]        | Ring/Schizont         | None       |

Sheet1

|      |                                             |               |           |                                                                                         |                       |            |
|------|---------------------------------------------|---------------|-----------|-----------------------------------------------------------------------------------------|-----------------------|------------|
| MOS  | MOS proto-oncogene, serine/threonine kinase | PF3D7_1247400 | PFL2275c  | FK506-binding protein (FKBP)-type peptidyl-propyl isomerase [Plasmodium falciparum 3D7] | Troph                 | GO:0006457 |
| MOS  | MOS proto-oncogene, serine/threonine kinase | PF3D7_1342400 | PF13_0232 | casein kinase II beta chain [Plasmodium falciparum 3D7]                                 | Troph                 | GO:0004674 |
| MTOR | mechanistic target of rapamycin kinase      | PF3D7_0515300 | PFE0765w  | phosphatidylinositol 3-kinase, putative [Plasmodium falciparum 3D7]                     | Global                | GO:0006897 |
| MTOR | mechanistic target of rapamycin kinase      | PF3D7_1247400 | PFL2275c  | FK506-binding protein (FKBP)-type peptidyl-propyl isomerase [Plasmodium falciparum 3D7] | Troph                 | GO:0006457 |
| MTOR | mechanistic target of rapamycin kinase      | PF3D7_1329300 | PF13_0149 | chromatin assembly factor 1 subunit, putative [Plasmodium falciparum 3D7]               | Global                | GO:0006333 |
| MTPN | myotrophin                                  | PF3D7_0309000 | PFC0380w  | dual-specificity protein phosphatase, putative                                          | Troph/<br>Gametocytes |            |
| MTPN | myotrophin                                  | PF3D7_0317200 | PFC0755c  | protein kinase, putative [Plasmodium falciparum 3D7]                                    | Schizont              | GO:0006468 |
| MTPN | myotrophin                                  | PF3D7_0528500 | PFE1420w  |                                                                                         |                       |            |
| MTPN | myotrophin                                  | PF3D7_1247800 | PFL2290w  | preprocathepsin precursor, putative                                                     | Troph/<br>Gametocytes |            |

Sheet1

|       |                                       |                   |           |                                                                                         |                       |            |
|-------|---------------------------------------|-------------------|-----------|-----------------------------------------------------------------------------------------|-----------------------|------------|
| MYL6  | myosin light chain 6                  | PF3D7_0317<br>200 | PFC0755c  | protein kinase, putative [Plasmodium falciparum 3D7]                                    | Schizont              | GO:0006468 |
| MYLK2 | myosin light chain kinase 2           | PF3D7_0309<br>000 | PFC0380w  | dual-specificity protein phosphatase, putative                                          | Troph/<br>Gametocytes |            |
| MYLK2 | myosin light chain kinase 2           | PF3D7_0317<br>200 | PFC0755c  | protein kinase, putative [Plasmodium falciparum 3D7]                                    | Schizont              | GO:0006468 |
| MYLK2 | myosin light chain kinase 2           | PF3D7_1030<br>800 | PF10_0301 | calmodulin, putative [Plasmodium falciparum 3D7]                                        | Global                | GO:0005509 |
| MYLK2 | myosin light chain kinase 2           | PF3D7_1121<br>300 | PF11_0220 | hypothetical protein                                                                    | Troph/<br>Gametocytes |            |
| MYLK2 | myosin light chain kinase 2           | PF3D7_1247<br>400 | PFL2275c  | FK506-binding protein (FKBP)-type peptidyl-propyl isomerase [Plasmodium falciparum 3D7] | Troph                 | GO:0006457 |
| MYLK2 | myosin light chain kinase 2           | PF3D7_1342<br>400 | PF13_0232 | casein kinase II beta chain [Plasmodium falciparum 3D7]                                 | Troph                 | GO:0004674 |
| MYO1D | myosin ID                             | PF3D7_1030<br>800 | PF10_0301 | calmodulin, putative [Plasmodium falciparum 3D7]                                        | Global                | GO:0005509 |
| NCBP1 | nuclear cap binding protein subunit 1 | PF3D7_1313<br>400 | PF13_0077 | DEAD box helicase, putative                                                             | Gametocytes           |            |
| NCBP2 | nuclear cap binding protein subunit 2 | PF3D7_0317<br>200 | PFC0755c  | protein kinase, putative [Plasmodium falciparum 3D7]                                    | Schizont              | GO:0006468 |

Sheet1

|       |                                       |                   |                 |                                                                                                         |                            |            |
|-------|---------------------------------------|-------------------|-----------------|---------------------------------------------------------------------------------------------------------|----------------------------|------------|
| NCBP2 | nuclear cap binding protein subunit 2 | PF3D7_1323<br>400 | PF13_0132       | 60S ribosomal protein L23a, putative [Plasmodium falciparum 3D7]                                        | Ring                       | GO:0006412 |
| NCBP2 | nuclear cap binding protein subunit 2 | PF3D7_1367<br>100 | MAL13P1.33E3D7] | nuclear ribonucleoprotein, putative [Plasmodium falciparum 3D7]                                         | Global                     | GO:0006396 |
| NOS1  | nitric oxide synthase 1               | PF3D7_0623<br>200 | PFF1115w        |                                                                                                         |                            |            |
| NOS1  | nitric oxide synthase 1               | PF3D7_0812<br>200 | MAL8P1.99       | GTPase, putative [Plasmodium falciparum 3D7]                                                            | Global                     | GO:0006508 |
| NOS1  | nitric oxide synthase 1               | PF3D7_1011<br>900 | PF10_0116       |                                                                                                         |                            |            |
| NUDT4 | nudix hydrolase 4                     | PF3D7_0520<br>600 | PFE1035c        | BIS(5'-nucleosyl)-tetraphosphatase (Diadenosine tetraphosphatase), putative [Plasmodium falciparum 3D7] | Ring/Troph                 | GO:0004081 |
| NUDT5 | nudix hydrolase 5                     | PF3D7_0520<br>600 | PFE1035c        | BIS(5'-nucleosyl)-tetraphosphatase (Diadenosine tetraphosphatase), putative [Plasmodium falciparum 3D7] | Ring/Troph                 | GO:0004081 |
| NUP43 | nucleoporin 43                        | PF3D7_1122<br>900 | PF11_0240       | dynein heavy chain, putative                                                                            | Merozoites/<br>Gametocytes |            |
| NUP43 | nucleoporin 43                        | PF3D7_1329<br>300 | PF13_0149       | chromatin assembly factor 1 subunit, putative [Plasmodium falciparum 3D7]                               | Global                     | GO:0006333 |



Sheet1

|       |                                 |                   |             |                                                                                  |                       |            |
|-------|---------------------------------|-------------------|-------------|----------------------------------------------------------------------------------|-----------------------|------------|
| OLA1  | Obg like ATPase 1               | PF3D7_0524<br>400 | PFE1215c    | cytosolic preribosomal GTP-binding protein, putative [Plasmodium falciparum 3D7] | Ring                  | GO:0005525 |
| OLA1  | Obg like ATPase 1               | PF3D7_0824<br>300 | MAL8P1.33   |                                                                                  |                       |            |
| OLA1  | Obg like ATPase 1               | PF3D7_1358<br>900 | MAL13P1.294 | GTP binding protein, putative [Plasmodium falciparum 3D7]                        | Global                | GO:0007165 |
| OSBP2 | oxysterol binding protein 2     | PF3D7_0317<br>200 | PFC0755c    | protein kinase, putative [Plasmodium falciparum 3D7]                             | Schizont              | GO:0006468 |
| OSBP2 | oxysterol binding protein 2     | PF3D7_1121<br>300 | PF11_0220   | hypothetical protein                                                             | Troph/<br>Gametocytes |            |
| OSBP2 | oxysterol binding protein 2     | PF3D7_1329<br>300 | PF13_0149   | chromatin assembly factor 1 subunit, putative [Plasmodium falciparum 3D7]        | Global                | GO:0006333 |
| OSBP2 | oxysterol binding protein 2     | PF3D7_1359<br>800 | MAL13P1.297 |                                                                                  |                       |            |
| OSTF1 | osteoclast stimulating factor 1 | PF3D7_0309<br>000 | PFC0380w    | dual-specificity protein phosphatase , putative                                  | Troph/<br>Gametocytes |            |
| OSTF1 | osteoclast stimulating factor 1 | PF3D7_0317<br>200 | PFC0755c    | protein kinase, putative [Plasmodium falciparum 3D7]                             | Schizont              | GO:0006468 |
| OSTF1 | osteoclast stimulating factor 1 | PF3D7_0528<br>500 | PFE1420w    |                                                                                  |                       |            |
| OSTF1 | osteoclast stimulating factor 1 | PF3D7_1121<br>300 | PF11_0220   | hypothetical protein                                                             | Troph/<br>Gametocytes |            |
| OSTF1 | osteoclast stimulating factor 1 | PF3D7_1247<br>800 | PFL2290w    | preprocathepsin c precursor, putative                                            | Troph/<br>Gametocytes |            |

Sheet1

|       |                                        |               |             |                                                                                         |                       |            |
|-------|----------------------------------------|---------------|-------------|-----------------------------------------------------------------------------------------|-----------------------|------------|
| OSTF1 | osteoclast stimulating factor 1        | PF3D7_1359800 | MAL13P1.297 |                                                                                         |                       |            |
| OXR1  | oxidative stress responsive kinase 1   | PF3D7_0309000 | PFC0380w    | dual-specificity protein phosphatase , putative                                         | Troph/<br>Gametocytes |            |
| OXR1  | oxidative stress responsive kinase 1   | PF3D7_0317200 | PFC0755c    | protein kinase, putative [Plasmodium falciparum 3D7]                                    | Schizont              | GO:0006468 |
| OXR1  | oxidative stress responsive kinase 1   | PF3D7_1030800 | PF10_0301   | calmodulin, putative [Plasmodium falciparum 3D7]                                        | Global                | GO:0005509 |
| OXR1  | oxidative stress responsive kinase 1   | PF3D7_1121300 | PF11_0220   | hypothetical protein                                                                    | Troph/<br>Gametocytes |            |
| OXR1  | oxidative stress responsive kinase 1   | PF3D7_1135100 | PF11_0362   | protein phosphatase , putative [Plasmodium falciparum 3D7]                              | Ring/Schizont         | None       |
| OXR1  | oxidative stress responsive kinase 1   | PF3D7_1247400 | PFL2275c    | FK506-binding protein (FKBP)-type peptidyl-propyl isomerase [Plasmodium falciparum 3D7] | Troph                 | GO:0006457 |
| OXR1  | oxidative stress responsive kinase 1   | PF3D7_1342400 | PF13_0232   | casein kinase II beta chain [Plasmodium falciparum 3D7]                                 | Troph                 | GO:0004674 |
| PAAF1 | proteasomal ATPase associated factor 1 | PF3D7_0816000 | PF08_0065   | nucleolar preribosomal assembly protein, putative [Plasmodium falciparum 3D7]           | Ring                  | None       |

Sheet1

|       |                                                           |                   |           |                                                                                                                      |                       |            |
|-------|-----------------------------------------------------------|-------------------|-----------|----------------------------------------------------------------------------------------------------------------------|-----------------------|------------|
| PAAF1 | proteasomal<br>ATPase<br>associated<br>factor 1           | PF3D7_0909<br>900 | PFI0480w  | helicase with<br>Zn-finger<br>motif,<br>putative<br>[Plasmodium<br>falciparum<br>3D7]                                | Global                | GO:0003676 |
| PAIP1 | poly(A)<br>binding<br>protein<br>interacting<br>protein 1 | PF3D7_1313<br>400 | PF13_0077 | DEAD box<br>helicase,<br>putative                                                                                    | Gametocytes           |            |
| PAK2  | p21 (RAC1)<br>activated<br>kinase 2                       | PF3D7_0309<br>000 | PFC0380w  | dual-<br>specificity<br>protein<br>phosphatase<br>, putative                                                         | Troph/<br>Gametocytes |            |
| PAK2  | p21 (RAC1)<br>activated<br>kinase 2                       | PF3D7_0317<br>200 | PFC0755c  | protein<br>kinase,<br>putative<br>[Plasmodium<br>falciparum<br>3D7]                                                  | Schizont              | GO:0006468 |
| PAK2  | p21 (RAC1)<br>activated<br>kinase 2                       | PF3D7_1030<br>800 | PF10_0301 | calmodulin,<br>putative<br>[Plasmodium<br>falciparum<br>3D7]                                                         | Global                | GO:0005509 |
| PAK2  | p21 (RAC1)<br>activated<br>kinase 2                       | PF3D7_1121<br>300 | PF11_0220 | hypothetical<br>protein                                                                                              | Troph/<br>Gametocytes |            |
| PAK2  | p21 (RAC1)<br>activated<br>kinase 2                       | PF3D7_1135<br>100 | PF11_0362 | protein<br>phosphatase<br>, putative<br>[Plasmodium<br>falciparum<br>3D7]                                            | Ring/Schizont         | None       |
| PAK2  | p21 (RAC1)<br>activated<br>kinase 2                       | PF3D7_1247<br>400 | PFL2275c  | FK506-<br>binding<br>protein<br>(FKBP)-type<br>peptidyl-<br>propyl<br>isomerase<br>[Plasmodium<br>falciparum<br>3D7] | Troph                 | GO:0006457 |
| PAK2  | p21 (RAC1)<br>activated<br>kinase 2                       | PF3D7_1342<br>400 | PF13_0232 | casein<br>kinase II beta<br>chain<br>[Plasmodium<br>falciparum<br>3D7]                                               | Troph                 | GO:0004674 |

Sheet1

|       |                                               |               |             |                                                                                         |            |            |
|-------|-----------------------------------------------|---------------|-------------|-----------------------------------------------------------------------------------------|------------|------------|
| PCBP1 | poly(rC) binding protein 1                    | PF3D7_0605100 | PFF0250w    | RNA binding protein, putative [Plasmodium falciparum 3D7]                               | Global     | GO:0003723 |
| PCBP2 | poly(rC) binding protein 2                    | PF3D7_0605100 | PFF0250w    | RNA binding protein, putative [Plasmodium falciparum 3D7]                               | Global     | GO:0003723 |
| PCCA  | propionyl-CoA carboxylase subunit alpha       | PF3D7_1308200 | PF13_0044   | carbamoyl phosphate synthetase [Plasmodium falciparum 3D7]                              | Ring/Troph | GO:0006807 |
| PDCD6 | programmed cell death 6                       | PF3D7_0317200 | PFC0755c    | protein kinase, putative [Plasmodium falciparum 3D7]                                    | Schizont   | GO:0006468 |
| PDCD6 | programmed cell death 6                       | PF3D7_1030800 | PF10_0301   | calmodulin, putative [Plasmodium falciparum 3D7]                                        | Global     | GO:0005509 |
| PDCD6 | programmed cell death 6                       | PF3D7_1247400 | PFL2275c    | FK506-binding protein (FKBP)-type peptidyl-propyl isomerase [Plasmodium falciparum 3D7] | Troph      | GO:0006457 |
| PDCL3 | phosducin like 3                              | PF3D7_1329300 | PF13_0149   | chromatin assembly factor 1 subunit, putative [Plasmodium falciparum 3D7]               | Global     | GO:0006333 |
| PDE6D | phosphodiesterase 6D                          | PF3D7_1359800 | MAL13P1.297 |                                                                                         |            |            |
| PDIA2 | protein disulfide isomerase family A member 2 | PF3D7_1411400 | PF14_0112   |                                                                                         |            |            |

Sheet1

|       |                                                     |                   |           |                                                                                         |                       |            |
|-------|-----------------------------------------------------|-------------------|-----------|-----------------------------------------------------------------------------------------|-----------------------|------------|
| PDIA3 | protein disulfide isomerase family A member 3       | PF3D7_1411<br>400 | PF14_0112 |                                                                                         |                       |            |
| PEA15 | proliferation and apoptosis adaptor protein 15      | PF3D7_0317<br>200 | PFC0755c  | protein kinase, putative [Plasmodium falciparum 3D7]                                    | Schizont              | GO:0006468 |
| PEBP1 | phosphatidylethanolamine binding protein 1          | PF3D7_1424<br>100 | PF14_0230 | 60S ribosomal protein L5, putative [Plasmodium falciparum 3D7]                          | Ring/Troph            | GO:0006412 |
| PEF1  | penta-EF-hand domain containing 1                   | PF3D7_0317<br>200 | PFC0755c  | protein kinase, putative [Plasmodium falciparum 3D7]                                    | Schizont              | GO:0006468 |
| PEF1  | penta-EF-hand domain containing 1                   | PF3D7_1247<br>400 | PFL2275c  | FK506-binding protein (FKBP)-type peptidyl-propyl isomerase [Plasmodium falciparum 3D7] | Troph                 | GO:0006457 |
| PELO  | pelota mRNA surveillance and ribosome rescue factor | PF3D7_0212<br>300 | PF02_0115 |                                                                                         |                       |            |
| PELO  | pelota mRNA surveillance and ribosome rescue factor | PF3D7_1123<br>400 | PF11_0245 | translation elongation factor EF-1, subunit alpha, putative [Plasmodium falciparum 3D7] | Ring/Troph            | GO:0006414 |
| PHKG2 | phosphorylase kinase catalytic subunit gamma 2      | PF3D7_0309<br>000 | PFC0380w  | dual-specificity protein phosphatase, putative                                          | Troph/<br>Gametocytes |            |

Sheet1

|       |                                                |                   |           |                                                                                         |                       |            |
|-------|------------------------------------------------|-------------------|-----------|-----------------------------------------------------------------------------------------|-----------------------|------------|
| PHKG2 | phosphorylase kinase catalytic subunit gamma 2 | PF3D7_0317<br>200 | PFC0755c  | protein kinase, putative [Plasmodium falciparum 3D7]                                    | Schizont              | GO:0006468 |
| PHKG2 | phosphorylase kinase catalytic subunit gamma 2 | PF3D7_1030<br>800 | PF10_0301 | calmodulin, putative [Plasmodium falciparum 3D7]                                        | Global                | GO:0005509 |
| PHKG2 | phosphorylase kinase catalytic subunit gamma 2 | PF3D7_1121<br>300 | PF11_0220 | hypothetical protein                                                                    | Troph/<br>Gametocytes |            |
| PHKG2 | phosphorylase kinase catalytic subunit gamma 2 | PF3D7_1135<br>100 | PF11_0362 | protein phosphatase, putative [Plasmodium falciparum 3D7]                               | Ring/Schizont         | None       |
| PHKG2 | phosphorylase kinase catalytic subunit gamma 2 | PF3D7_1216<br>900 | PFL0815w  | DNA-binding chaperone, putative [Plasmodium falciparum 3D7]                             | Ring/Troph            | GO:0003677 |
| PHKG2 | phosphorylase kinase catalytic subunit gamma 2 | PF3D7_1247<br>400 | PFL2275c  | FK506-binding protein (FKBP)-type peptidyl-propyl isomerase [Plasmodium falciparum 3D7] | Troph                 | GO:0006457 |
| PHKG2 | phosphorylase kinase catalytic subunit gamma 2 | PF3D7_1342<br>400 | PF13_0232 | casein kinase II beta chain [Plasmodium falciparum 3D7]                                 | Troph                 | GO:0004674 |
| PKN1  | protein kinase N1                              | PF3D7_0309<br>000 | PFC0380w  | dual-specificity protein phosphatase, putative                                          | Troph/<br>Gametocytes |            |
| PKN1  | protein kinase N1                              | PF3D7_0317<br>200 | PFC0755c  | protein kinase, putative [Plasmodium falciparum 3D7]                                    | Schizont              | GO:0006468 |

Sheet1

|       |                                         |                   |             |                                                                                         |                       |            |
|-------|-----------------------------------------|-------------------|-------------|-----------------------------------------------------------------------------------------|-----------------------|------------|
| PKN1  | protein kinase N1                       | PF3D7_1030<br>800 | PF10_0301   | calmodulin, putative [Plasmodium falciparum 3D7]                                        | Global                | GO:0005509 |
| PKN1  | protein kinase N1                       | PF3D7_1121<br>300 | PF11_0220   | hypothetical protein                                                                    | Troph/<br>Gametocytes |            |
| PKN1  | protein kinase N1                       | PF3D7_1135<br>100 | PF11_0362   | protein phosphatase, putative [Plasmodium falciparum 3D7]                               | Ring/Schizont         | None       |
| PKN1  | protein kinase N1                       | PF3D7_1247<br>400 | PFL2275c    | FK506-binding protein (FKBP)-type peptidyl-propyl isomerase [Plasmodium falciparum 3D7] | Troph                 | GO:0006457 |
| PKN1  | protein kinase N1                       | PF3D7_1342<br>400 | PF13_0232   | casein kinase II beta chain [Plasmodium falciparum 3D7]                                 | Troph                 | GO:0004674 |
| PLCB3 | phospholipase C beta 3                  | PF3D7_1243<br>900 | PFL2110c    | conserved protein [Plasmodium falciparum 3D7]                                           |                       |            |
| PLEK2 | pleckstrin 2                            | PF3D7_0317<br>200 | PFC0755c    | protein kinase, putative [Plasmodium falciparum 3D7]                                    | Schizont              | GO:0006468 |
| PLEK2 | pleckstrin 2                            | PF3D7_1121<br>300 | PF11_0220   | hypothetical protein                                                                    | Troph/<br>Gametocytes |            |
| PLEK2 | pleckstrin 2                            | PF3D7_1359<br>800 | MAL13P1.297 |                                                                                         |                       |            |
| PPCS  | phosphopant othenoylcysteine synthetase | PF3D7_0412<br>300 | PFD0610w    | phosphopant othenoylcysteine synthetase, putative [Plasmodium falciparum 3D7]           | Global                | None       |
| PPIL4 | peptidylprolyl isomerase like 4         | PF3D7_0317<br>200 | PFC0755c    | protein kinase, putative [Plasmodium falciparum 3D7]                                    | Schizont              | GO:0006468 |

Sheet1

|       |                                                                      |               |           |                                                           |               |            |
|-------|----------------------------------------------------------------------|---------------|-----------|-----------------------------------------------------------|---------------|------------|
| PPM1A | protein phosphatase, Mg <sup>2+</sup> /Mn <sup>2+</sup> dependent 1A | PF3D7_0317200 | PFC0755c  | protein kinase, putative [Plasmodium falciparum 3D7]      | Schizont      | GO:0006468 |
| PPM1A | protein phosphatase, Mg <sup>2+</sup> /Mn <sup>2+</sup> dependent 1A | PF3D7_1135100 | PF11_0362 | protein phosphatase, putative [Plasmodium falciparum 3D7] | Ring/Schizont | None       |
| PPM1B | protein phosphatase, Mg <sup>2+</sup> /Mn <sup>2+</sup> dependent 1B | PF3D7_0317200 | PFC0755c  | protein kinase, putative [Plasmodium falciparum 3D7]      | Schizont      | GO:0006468 |
| PPM1B | protein phosphatase, Mg <sup>2+</sup> /Mn <sup>2+</sup> dependent 1B | PF3D7_1135100 | PF11_0362 | protein phosphatase, putative [Plasmodium falciparum 3D7] | Ring/Schizont | None       |
| PPME1 | protein phosphatase methylesterase 1                                 | PF3D7_0709700 | PF07_0040 | lysophospholipase, putative [Plasmodium falciparum 3D7]   | Schizont      | GO:0006644 |
| PPME1 | protein phosphatase methylesterase 1                                 | PF3D7_1038900 | PF10_0379 | phospholipase, putative [Plasmodium falciparum 3D7]       | Global        | GO:0016787 |
| PPME1 | protein phosphatase methylesterase 1                                 | PF3D7_1401500 | PF14_0017 |                                                           |               |            |
| PRDX5 | peroxiredoxin 5                                                      | PF3D7_1430900 | PF14_0288 | cytochrome C oxidase subunit II precursor, putative       | Gametocytes   |            |
| PRG2  | proteoglycan 2, pro eosinophil major basic protein                   | PF3D7_0616500 | PFF0800w  |                                                           |               |            |
| PROZ  | protein Z, vitamin K dependent plasma glycoprotein                   | PF3D7_0616500 | PFF0800w  |                                                           |               |            |



Sheet1

|       |                                                                |                   |             |                                                                                                 |                            |            |
|-------|----------------------------------------------------------------|-------------------|-------------|-------------------------------------------------------------------------------------------------|----------------------------|------------|
| PROZ  | protein Z,<br>vitamin K<br>dependent<br>plasma<br>glycoprotein | PF3D7_0911<br>300 | PFI0550w    | hypothetical<br>protein                                                                         | Sporozoites/<br>Merozoites |            |
| PRPS1 | phosphoribo<br>syl<br>pyrophospha<br>te synthetase             | PF3D7_1327<br>800 | PF13_0157   | ribose-<br>phosphate<br>pyrophospho<br>kinase,<br>putative<br>[Plasmodium<br>falciparum<br>3D7] | Global                     | GO:0000105 |
| PSMD1 | proteasome<br>26S subunit,<br>non-ATPase                       | PF3D7_0317<br>200 | PFC0755c    | protein<br>kinase,<br>putative<br>[Plasmodium<br>falciparum<br>3D7]                             | Schizont                   | GO:0006468 |
| PSMD1 | proteasome<br>26S subunit,<br>non-ATPase                       | PF3D7_1338<br>100 | MAL13P1.19C | proteasome<br>regulatory<br>component,<br>putative<br>[Plasmodium<br>falciparum<br>3D7]         | Global                     | GO:0006511 |
| PSMD3 | proteasome<br>26S subunit,<br>non-ATPase                       | PF3D7_1338<br>100 | MAL13P1.19C | proteasome<br>regulatory<br>component,<br>putative<br>[Plasmodium<br>falciparum<br>3D7]         | Global                     | GO:0006511 |
| PSMD6 | proteasome<br>26S subunit,<br>non-ATPase                       | PF3D7_1338<br>100 | MAL13P1.19C | proteasome<br>regulatory<br>component,<br>putative<br>[Plasmodium<br>falciparum<br>3D7]         | Global                     | GO:0006511 |
| PSMD7 | proteasome<br>26S subunit,<br>non-ATPase                       | PF3D7_0612<br>100 | PFF0590c    | homologue<br>of human<br>HSPC025<br>[Plasmodium<br>falciparum<br>3D7]                           | Unknown                    | None       |
| PSMD7 | proteasome<br>26S subunit,<br>non-ATPase                       | PF3D7_1338<br>100 | MAL13P1.19C | proteasome<br>regulatory<br>component,<br>putative<br>[Plasmodium<br>falciparum<br>3D7]         | Global                     | GO:0006511 |

Sheet1

|       |                                                  |                   |             |                                                                                                    |          |            |
|-------|--------------------------------------------------|-------------------|-------------|----------------------------------------------------------------------------------------------------|----------|------------|
| PSMD8 | proteasome<br>26S subunit,<br>non-ATPase<br>8    | PF3D7_1338<br>100 | MAL13P1.19C | proteasome<br>regulatory<br>component,<br>putative<br>[Plasmodium<br>falciparum<br>3D7]            | Global   | GO:0006511 |
| PTBP1 | polypyrimidin<br>e tract<br>binding<br>protein 1 | PF3D7_0317<br>200 | PFC0755c    | protein<br>kinase,<br>putative<br>[Plasmodium<br>falciparum<br>3D7]                                | Schizont | GO:0006468 |
| PTBP1 | polypyrimidin<br>e tract<br>binding<br>protein 1 | PF3D7_1323<br>400 | PF13_0132   | 60S<br>ribosomal<br>protein L23a,<br>putative<br>[Plasmodium<br>falciparum<br>3D7]                 | Ring     | GO:0006412 |
| PTBP1 | polypyrimidin<br>e tract<br>binding<br>protein 1 | PF3D7_1367<br>100 | MAL13P1.33E | putative<br>[Plasmodium<br>falciparum<br>3D7]                                                      | Global   | GO:0006396 |
| PWP1  | PWP1<br>homolog,<br>endonuclein                  | PF3D7_0816<br>000 | PF08_0065   | nucleolar<br>preribosomal<br>assembly<br>protein,<br>putative<br>[Plasmodium<br>falciparum<br>3D7] | Ring     | None       |
| RAB10 | RAB10,<br>member<br>RAS<br>oncogene<br>family    | PF3D7_0317<br>200 | PFC0755c    | protein<br>kinase,<br>putative<br>[Plasmodium<br>falciparum<br>3D7]                                | Schizont | GO:0006468 |
| RAB10 | RAB10,<br>member<br>RAS<br>oncogene<br>family    | PF3D7_0932<br>800 | PFI1590c    | conserved<br>Plasmodium<br>protein,<br>unknown<br>function<br>[Plasmodium<br>falciparum<br>3D7]    | Unknown  | GO:0006886 |
| RAB13 | RAB13,<br>member<br>RAS<br>oncogene<br>family    | PF3D7_0317<br>200 | PFC0755c    | protein<br>kinase,<br>putative<br>[Plasmodium<br>falciparum<br>3D7]                                | Schizont | GO:0006468 |

Sheet1

|       |                                               |                   |          |                                                                                                 |          |            |
|-------|-----------------------------------------------|-------------------|----------|-------------------------------------------------------------------------------------------------|----------|------------|
| RAB13 | RAB13,<br>member<br>RAS<br>oncogene<br>family | PF3D7_0932<br>800 | PFI1590c | conserved<br>Plasmodium<br>protein,<br>unknown<br>function<br>[Plasmodium<br>falciparum<br>3D7] | Unknown  | GO:0006886 |
| RAB14 | RAB14,<br>member<br>RAS<br>oncogene<br>family | PF3D7_0317<br>200 | PFC0755c | protein<br>kinase,<br>putative<br>[Plasmodium<br>falciparum<br>3D7]                             | Schizont | GO:0006468 |
| RAB18 | RAB18,<br>member<br>RAS<br>oncogene<br>family | PF3D7_0317<br>200 | PFC0755c | protein<br>kinase,<br>putative<br>[Plasmodium<br>falciparum<br>3D7]                             | Schizont | GO:0006468 |
| RAB18 | RAB18,<br>member<br>RAS<br>oncogene<br>family | PF3D7_0932<br>800 | PFI1590c | conserved<br>Plasmodium<br>protein,<br>unknown<br>function<br>[Plasmodium<br>falciparum<br>3D7] | Unknown  | GO:0006886 |
| RAB1A | RAB1A,<br>member<br>RAS<br>oncogene<br>family | PF3D7_0317<br>200 | PFC0755c | protein<br>kinase,<br>putative<br>[Plasmodium<br>falciparum<br>3D7]                             | Schizont | GO:0006468 |
| RAB1A | RAB1A,<br>member<br>RAS<br>oncogene<br>family | PF3D7_0932<br>800 | PFI1590c | conserved<br>Plasmodium<br>protein,<br>unknown<br>function<br>[Plasmodium<br>falciparum<br>3D7] | Unknown  | GO:0006886 |
| RAB1B | RAB1B,<br>member<br>RAS<br>oncogene<br>family | PF3D7_0317<br>200 | PFC0755c | protein<br>kinase,<br>putative<br>[Plasmodium<br>falciparum<br>3D7]                             | Schizont | GO:0006468 |
| RAB1B | RAB1B,<br>member<br>RAS<br>oncogene<br>family | PF3D7_0932<br>800 | PFI1590c | conserved<br>Plasmodium<br>protein,<br>unknown<br>function<br>[Plasmodium<br>falciparum<br>3D7] | Unknown  | GO:0006886 |

## Sheet1

|       |                                               |                   |          |                                                                                                 |          |            |
|-------|-----------------------------------------------|-------------------|----------|-------------------------------------------------------------------------------------------------|----------|------------|
| RAB21 | RAB21,<br>member<br>RAS<br>oncogene<br>family | PF3D7_0317<br>200 | PFC0755c | protein<br>kinase,<br>putative<br>[Plasmodium<br>falciparum<br>3D7]                             | Schizont | GO:0006468 |
| RAB21 | RAB21,<br>member<br>RAS<br>oncogene<br>family | PF3D7_0932<br>800 | PFI1590c | conserved<br>Plasmodium<br>protein,<br>unknown<br>function<br>[Plasmodium<br>falciparum<br>3D7] | Unknown  | GO:0006886 |
| RAB28 | RAB28,<br>member<br>RAS<br>oncogene<br>family | PF3D7_0317<br>200 | PFC0755c | protein<br>kinase,<br>putative<br>[Plasmodium<br>falciparum<br>3D7]                             | Schizont | GO:0006468 |
| RAB2A | RAB2A,<br>member<br>RAS<br>oncogene<br>family | PF3D7_0317<br>200 | PFC0755c | protein<br>kinase,<br>putative<br>[Plasmodium<br>falciparum<br>3D7]                             | Schizont | GO:0006468 |
| RAB2B | RAB2B,<br>member<br>RAS<br>oncogene<br>family | PF3D7_0317<br>200 | PFC0755c | protein<br>kinase,<br>putative<br>[Plasmodium<br>falciparum<br>3D7]                             | Schizont | GO:0006468 |
| RAB35 | RAB35,<br>member<br>RAS<br>oncogene<br>family | PF3D7_0317<br>200 | PFC0755c | protein<br>kinase,<br>putative<br>[Plasmodium<br>falciparum<br>3D7]                             | Schizont | GO:0006468 |
| RAB35 | RAB35,<br>member<br>RAS<br>oncogene<br>family | PF3D7_0932<br>800 | PFI1590c | conserved<br>Plasmodium<br>protein,<br>unknown<br>function<br>[Plasmodium<br>falciparum<br>3D7] | Unknown  | GO:0006886 |
| RAB4A | RAB4A,<br>member<br>RAS<br>oncogene<br>family | PF3D7_0317<br>200 | PFC0755c | protein<br>kinase,<br>putative<br>[Plasmodium<br>falciparum<br>3D7]                             | Schizont | GO:0006468 |

## Sheet1

|       |                                               |                   |          |                                                                                                 |          |            |
|-------|-----------------------------------------------|-------------------|----------|-------------------------------------------------------------------------------------------------|----------|------------|
| RAB4A | RAB4A,<br>member<br>RAS<br>oncogene<br>family | PF3D7_0932<br>800 | PFI1590c | conserved<br>Plasmodium<br>protein,<br>unknown<br>function<br>[Plasmodium<br>falciparum<br>3D7] | Unknown  | GO:0006886 |
| RAB4B | RAB4B,<br>member<br>RAS<br>oncogene<br>family | PF3D7_0317<br>200 | PFC0755c | protein<br>kinase,<br>putative<br>[Plasmodium<br>falciparum<br>3D7]                             | Schizont | GO:0006468 |
| RAB4B | RAB4B,<br>member<br>RAS<br>oncogene<br>family | PF3D7_0932<br>800 | PFI1590c | conserved<br>Plasmodium<br>protein,<br>unknown<br>function<br>[Plasmodium<br>falciparum<br>3D7] | Unknown  | GO:0006886 |
| RAB5B | RAB5B,<br>member<br>RAS<br>oncogene<br>family | PF3D7_0317<br>200 | PFC0755c | protein<br>kinase,<br>putative<br>[Plasmodium<br>falciparum<br>3D7]                             | Schizont | GO:0006468 |
| RAB5B | RAB5B,<br>member<br>RAS<br>oncogene<br>family | PF3D7_0932<br>800 | PFI1590c | conserved<br>Plasmodium<br>protein,<br>unknown<br>function<br>[Plasmodium<br>falciparum<br>3D7] | Unknown  | GO:0006886 |
| RAB5C | RAB5C,<br>member<br>RAS<br>oncogene<br>family | PF3D7_0317<br>200 | PFC0755c | protein<br>kinase,<br>putative<br>[Plasmodium<br>falciparum<br>3D7]                             | Schizont | GO:0006468 |
| RAB5C | RAB5C,<br>member<br>RAS<br>oncogene<br>family | PF3D7_0932<br>800 | PFI1590c | conserved<br>Plasmodium<br>protein,<br>unknown<br>function<br>[Plasmodium<br>falciparum<br>3D7] | Unknown  | GO:0006886 |
| RAB6B | RAB6B,<br>member<br>RAS<br>oncogene<br>family | PF3D7_0317<br>200 | PFC0755c | protein<br>kinase,<br>putative<br>[Plasmodium<br>falciparum<br>3D7]                             | Schizont | GO:0006468 |

Sheet1

|       |                                               |                   |          |                                                                                                 |          |            |
|-------|-----------------------------------------------|-------------------|----------|-------------------------------------------------------------------------------------------------|----------|------------|
| RAB6C | RAB6C,<br>member<br>RAS<br>oncogene<br>family | PF3D7_0317<br>200 | PFC0755c | protein<br>kinase,<br>putative<br>[Plasmodium<br>falciparum<br>3D7]                             | Schizont | GO:0006468 |
| RAB7A | RAB7A,<br>member<br>RAS<br>oncogene<br>family | PF3D7_0317<br>200 | PFC0755c | protein<br>kinase,<br>putative<br>[Plasmodium<br>falciparum<br>3D7]                             | Schizont | GO:0006468 |
| RAB7A | RAB7A,<br>member<br>RAS<br>oncogene<br>family | PF3D7_0932<br>800 | PFI1590c | conserved<br>Plasmodium<br>protein,<br>unknown<br>function<br>[Plasmodium<br>falciparum<br>3D7] | Unknown  | GO:0006886 |
| RAB8A | RAB8A,<br>member<br>RAS<br>oncogene<br>family | PF3D7_0317<br>200 | PFC0755c | protein<br>kinase,<br>putative<br>[Plasmodium<br>falciparum<br>3D7]                             | Schizont | GO:0006468 |
| RAB8A | RAB8A,<br>member<br>RAS<br>oncogene<br>family | PF3D7_0932<br>800 | PFI1590c | conserved<br>Plasmodium<br>protein,<br>unknown<br>function<br>[Plasmodium<br>falciparum<br>3D7] | Unknown  | GO:0006886 |
| RAB8B | RAB8B,<br>member<br>RAS<br>oncogene<br>family | PF3D7_0317<br>200 | PFC0755c | protein<br>kinase,<br>putative<br>[Plasmodium<br>falciparum<br>3D7]                             | Schizont | GO:0006468 |
| RAB8B | RAB8B,<br>member<br>RAS<br>oncogene<br>family | PF3D7_0932<br>800 | PFI1590c | conserved<br>Plasmodium<br>protein,<br>unknown<br>function<br>[Plasmodium<br>falciparum<br>3D7] | Unknown  | GO:0006886 |
| RAC1  | Rac family<br>small<br>GTPase 1               | PF3D7_0317<br>200 | PFC0755c | protein<br>kinase,<br>putative<br>[Plasmodium<br>falciparum<br>3D7]                             | Schizont | GO:0006468 |

## Sheet1

|       |                                      |               |          |                                                                            |          |            |
|-------|--------------------------------------|---------------|----------|----------------------------------------------------------------------------|----------|------------|
| RALA  | RAS like proto-oncogene A            | PF3D7_0317200 | PFC0755c | protein kinase, putative [Plasmodium falciparum 3D7]                       | Schizont | GO:0006468 |
| RAN   | RAN, member RAS oncogene family      | PF3D7_0317200 | PFC0755c | protein kinase, putative [Plasmodium falciparum 3D7]                       | Schizont | GO:0006468 |
| RAN   | RAN, member RAS oncogene family      | PF3D7_0932800 | PFI1590c | conserved Plasmodium protein, unknown function [Plasmodium falciparum 3D7] | Unknown  | GO:0006886 |
| RAP1A | RAP1A, member of RAS oncogene family | PF3D7_0317200 | PFC0755c | protein kinase, putative [Plasmodium falciparum 3D7]                       | Schizont | GO:0006468 |
| RAP1B | RAP1B, member of RAS oncogene family | PF3D7_0317200 | PFC0755c | protein kinase, putative [Plasmodium falciparum 3D7]                       | Schizont | GO:0006468 |
| RAP2A | RAP2A, member of RAS oncogene family | PF3D7_0317200 | PFC0755c | protein kinase, putative [Plasmodium falciparum 3D7]                       | Schizont | GO:0006468 |
| RAP2B | RAP2B, member of RAS oncogene family | PF3D7_0317200 | PFC0755c | protein kinase, putative [Plasmodium falciparum 3D7]                       | Schizont | GO:0006468 |
| RAP2C | RAP2C, member of RAS oncogene family | PF3D7_0317200 | PFC0755c | protein kinase, putative [Plasmodium falciparum 3D7]                       | Schizont | GO:0006468 |
| RASA2 | RAS p21 protein activator 2          | PF3D7_0317200 | PFC0755c | protein kinase, putative [Plasmodium falciparum 3D7]                       | Schizont | GO:0006468 |

Sheet1

|       |                                                   |               |                 |                                                                               |                   |            |
|-------|---------------------------------------------------|---------------|-----------------|-------------------------------------------------------------------------------|-------------------|------------|
| RASA2 | RAS p21 protein activator 2                       | PF3D7_1121300 | PF11_0220       | hypothetical protein conserved protein [Plasmodium falciparum 3D7]            | Troph/Gametocytes |            |
| RASA2 | RAS p21 protein activator 2                       | PF3D7_1243900 | PFL2110c        |                                                                               |                   |            |
| RASA2 | RAS p21 protein activator 2                       | PF3D7_1359800 | MAL13P1.297     |                                                                               |                   |            |
| RASD1 | ras related dexamethasone induced 1               | PF3D7_0317200 | PFC0755c        | protein kinase, putative [Plasmodium falciparum 3D7]                          | Schizont          | GO:0006468 |
| RBBP7 | RB binding protein 7, chromatin remodeling factor | PF3D7_0816000 | PF08_0065       | nucleolar preribosomal assembly protein, putative [Plasmodium falciparum 3D7] | Ring              | None       |
| RBM38 | RNA binding motif protein 38                      | PF3D7_0317200 | PFC0755c        | protein kinase, putative [Plasmodium falciparum 3D7]                          | Schizont          | GO:0006468 |
| RBM38 | RNA binding motif protein 38                      | PF3D7_1323400 | PF13_0132       | 60S ribosomal protein L23a, putative [Plasmodium falciparum 3D7]              | Ring              | GO:0006412 |
| RBM8A | RNA binding motif protein 8A                      | PF3D7_0317200 | PFC0755c        | protein kinase, putative [Plasmodium falciparum 3D7]                          | Schizont          | GO:0006468 |
| RBM8A | RNA binding motif protein 8A                      | PF3D7_1323400 | PF13_0132       | 60S ribosomal protein L23a, putative [Plasmodium falciparum 3D7]              | Ring              | GO:0006412 |
| RBM8A | RNA binding motif protein 8A                      | PF3D7_1367100 | MAL13P1.33E3D7] | 91 small nuclear ribonucleoprotein, putative [Plasmodium falciparum 3D7]      | Global            | GO:0006396 |



Sheet1

|       |                                                        |                   |             |                                                                       |                   |            |
|-------|--------------------------------------------------------|-------------------|-------------|-----------------------------------------------------------------------|-------------------|------------|
| RBMX  | RNA binding motif protein X-linked                     | PF3D7_0317<br>200 | PFC0755c    | protein kinase, putative [Plasmodium falciparum 3D7]                  | Schizont          | GO:0006468 |
| RBMX  | RNA binding motif protein X-linked                     | PF3D7_1323<br>400 | PF13_0132   | 60S ribosomal protein L23a, putative [Plasmodium falciparum 3D7]      | Ring              | GO:0006412 |
| RBMX  | RNA binding motif protein X-linked                     | PF3D7_1367<br>100 | MAL13P1.33E | small nuclear ribonucleoprotein, putative [Plasmodium falciparum 3D7] | Global            | GO:0006396 |
| RGS10 | regulator of G protein signaling 10                    | PF3D7_0317<br>200 | PFC0755c    | protein kinase, putative [Plasmodium falciparum 3D7]                  | Schizont          | GO:0006468 |
| RHOA  | ras homolog family member A                            | PF3D7_0317<br>200 | PFC0755c    | protein kinase, putative [Plasmodium falciparum 3D7]                  | Schizont          | GO:0006468 |
| RHOB  | ras homolog family member B                            | PF3D7_0317<br>200 | PFC0755c    | protein kinase, putative [Plasmodium falciparum 3D7]                  | Schizont          | GO:0006468 |
| RNH1  | ribonuclease/angiogenin inhibitor 1                    | PF3D7_0212<br>300 | PF02_0115   |                                                                       |                   |            |
| ROCK1 | Rho associated coiled-coil containing protein kinase 1 | PF3D7_0309<br>000 | PFC0380w    | dual-specificity protein phosphatase , putative                       | Troph/Gametocytes |            |
| ROCK1 | Rho associated coiled-coil containing protein kinase 1 | PF3D7_0317<br>200 | PFC0755c    | protein kinase, putative [Plasmodium falciparum 3D7]                  | Schizont          | GO:0006468 |

Sheet1

|       |                                                        |               |           |                                                                                         |                       |            |
|-------|--------------------------------------------------------|---------------|-----------|-----------------------------------------------------------------------------------------|-----------------------|------------|
| ROCK1 | Rho associated coiled-coil containing protein kinase 1 | PF3D7_1030800 | PF10_0301 | calmodulin, putative [Plasmodium falciparum 3D7]                                        | Global                | GO:0005509 |
| ROCK1 | Rho associated coiled-coil containing protein kinase 1 | PF3D7_1121300 | PF11_0220 | hypothetical protein                                                                    | Troph/<br>Gametocytes |            |
| ROCK1 | Rho associated coiled-coil containing protein kinase 1 | PF3D7_1135100 | PF11_0362 | protein phosphatase, putative [Plasmodium falciparum 3D7]                               | Ring/Schizont         | None       |
| ROCK1 | Rho associated coiled-coil containing protein kinase 1 | PF3D7_1247400 | PFL2275c  | FK506-binding protein (FKBP)-type peptidyl-propyl isomerase [Plasmodium falciparum 3D7] | Troph                 | GO:0006457 |
| ROCK1 | Rho associated coiled-coil containing protein kinase 1 | PF3D7_1342400 | PF13_0232 | casein kinase II beta chain [Plasmodium falciparum 3D7]                                 | Troph                 | GO:0004674 |
| ROCK2 | Rho associated coiled-coil containing protein kinase 2 | PF3D7_0309000 | PFC0380w  | dual-specificity protein phosphatase, putative                                          | Troph/<br>Gametocytes |            |
| ROCK2 | Rho associated coiled-coil containing protein kinase 2 | PF3D7_0317200 | PFC0755c  | protein kinase, putative [Plasmodium falciparum 3D7]                                    | Schizont              | GO:0006468 |
| ROCK2 | Rho associated coiled-coil containing protein kinase 2 | PF3D7_1030800 | PF10_0301 | calmodulin, putative [Plasmodium falciparum 3D7]                                        | Global                | GO:0005509 |
| ROCK2 | Rho associated coiled-coil containing protein kinase 2 | PF3D7_1121300 | PF11_0220 | hypothetical protein                                                                    | Troph/<br>Gametocytes |            |

## Sheet1

|       |                                                        |               |           |                                                                                         |               |            |
|-------|--------------------------------------------------------|---------------|-----------|-----------------------------------------------------------------------------------------|---------------|------------|
| ROCK2 | Rho associated coiled-coil containing protein kinase 2 | PF3D7_1135100 | PF11_0362 | protein phosphatase, putative [Plasmodium falciparum 3D7]                               | Ring/Schizont | None       |
| ROCK2 | Rho associated coiled-coil containing protein kinase 2 | PF3D7_1247400 | PFL2275c  | FK506-binding protein (FKBP)-type peptidyl-propyl isomerase [Plasmodium falciparum 3D7] | Troph         | GO:0006457 |
| ROCK2 | Rho associated coiled-coil containing protein kinase 2 | PF3D7_1342400 | PF13_0232 | casein kinase II beta chain [Plasmodium falciparum 3D7]                                 | Troph         | GO:0004674 |
| RPIA  | ribose 5-phosphate isomerase A                         | PF3D7_0514600 | PFE0730c  | ribose 5-phosphate epimerase, putative                                                  | Merozoites    |            |
| RPTOR | regulatory associated protein of MTOR complex 1        | PF3D7_0317200 | PFC0755c  | protein kinase, putative [Plasmodium falciparum 3D7]                                    | Schizont      | GO:0006468 |
| RPTOR | regulatory associated protein of MTOR complex 1        | PF3D7_0816000 | PF08_0065 | nucleolar preribosomal assembly protein, putative [Plasmodium falciparum 3D7]           | Ring          | None       |
| RPTOR | regulatory associated protein of MTOR complex 1        | PF3D7_1036700 | PF10_0359 |                                                                                         |               |            |
| RPTOR | regulatory associated protein of MTOR complex 1        | PF3D7_1329300 | PF13_0149 | chromatin assembly factor 1 subunit, putative [Plasmodium falciparum 3D7]               | Global        | GO:0006333 |
| RSU1  | Ras suppressor protein 1                               | PF3D7_0616500 | PFF0800w  |                                                                                         |               |            |

Sheet1

|       |                                            |                   |                 |                                                                          |                       |            |
|-------|--------------------------------------------|-------------------|-----------------|--------------------------------------------------------------------------|-----------------------|------------|
| RWDD1 | RWD domain containing 1                    | PF3D7_1358<br>900 | MAL13P1.2943D7] | GTP binding protein, putative [Plasmodium falciparum                     | Global                | GO:0007165 |
| SAR1B | secretion associated Ras related GTPase 1B | PF3D7_1359<br>800 | MAL13P1.297     |                                                                          |                       |            |
| SAR1B | secretion associated Ras related GTPase 1B | PF3D7_1442<br>900 | PF14_0407       | guanine nucleotide exchange factor, putative [Plasmodium falciparum 3D7] | Ring                  | GO:0032012 |
| SBDS  | SBDS ribosome maturation factor            | PF3D7_0602<br>400 | PFF0115c        |                                                                          |                       |            |
| SCFD1 | sec1 family domain containing 1            | PF3D7_0613<br>700 | PFF0665c        | syntaxin binding protein, putative [Plasmodium falciparum 3D7]           | Global                | GO:0006904 |
| SCYL1 | SCY1 like pseudokinase 1                   | PF3D7_0309<br>000 | PFC0380w        | dual-specificity protein phosphatase , putative                          | Troph/<br>Gametocytes |            |
| SCYL1 | SCY1 like pseudokinase 1                   | PF3D7_0317<br>200 | PFC0755c        | protein kinase, putative [Plasmodium falciparum 3D7]                     | Schizont              | GO:0006468 |
| SCYL1 | SCY1 like pseudokinase 1                   | PF3D7_1121<br>300 | PF11_0220       | hypothetical protein                                                     | Troph/<br>Gametocytes |            |
| SCYL1 | SCY1 like pseudokinase 1                   | PF3D7_1135<br>100 | PF11_0362       | protein phosphatase , putative [Plasmodium falciparum 3D7]               | Ring/Schizont         | None       |

Sheet1

|       |                                                              |               |             |                                                                                         |                            |            |
|-------|--------------------------------------------------------------|---------------|-------------|-----------------------------------------------------------------------------------------|----------------------------|------------|
| SCYL1 | SCY1 like pseudokinase 1                                     | PF3D7_1247400 | PFL2275c    | FK506-binding protein (FKBP)-type peptidyl-propyl isomerase [Plasmodium falciparum 3D7] | Troph                      | GO:0006457 |
| SCYL1 | SCY1 like pseudokinase 1                                     | PF3D7_1342400 | PF13_0232   | casein kinase II beta chain [Plasmodium falciparum 3D7]                                 | Troph                      | GO:0004674 |
| SEC13 | SEC13 homolog, nuclear pore and COPII coat complex component | PF3D7_1036700 | PF10_0359   |                                                                                         |                            |            |
| SEC13 | SEC13 homolog, nuclear pore and COPII coat complex component | PF3D7_1122900 | PF11_0240   | dynein heavy chain, putative                                                            | Merozoites/<br>Gametocytes |            |
| SEC13 | SEC13 homolog, nuclear pore and COPII coat complex component | PF3D7_1329300 | PF13_0149   | chromatin assembly factor 1 subunit, putative [Plasmodium falciparum 3D7]               | Global                     | GO:0006333 |
| SF3B4 | splicing factor 3b subunit 4                                 | PF3D7_0317200 | PFC0755c    | protein kinase, putative [Plasmodium falciparum 3D7]                                    | Schizont                   | GO:0006468 |
| SF3B4 | splicing factor 3b subunit 4                                 | PF3D7_1323400 | PF13_0132   | 60S ribosomal protein L23a, putative [Plasmodium falciparum 3D7]                        | Ring                       | GO:0006412 |
| SF3B4 | splicing factor 3b subunit 4                                 | PF3D7_1367100 | MAL13P1.33E | U1 small nuclear ribonucleoprotein, putative [Plasmodium falciparum 3D7]                | Global                     | GO:0006396 |

Sheet1

|       |                       |                   |             |                                                                                         |                   |            |
|-------|-----------------------|-------------------|-------------|-----------------------------------------------------------------------------------------|-------------------|------------|
| SHC1  | SHC adaptor protein 1 | PF3D7_0515<br>300 | PFE0765w    | phosphatidylinositol 3-kinase, putative [Plasmodium falciparum 3D7]                     | Global            | GO:0006897 |
| SHC1  | SHC adaptor protein 1 | PF3D7_1121<br>300 | PF11_0220   | hypothetical protein conserved protein [Plasmodium falciparum 3D7]                      | Troph/Gametocytes |            |
| SHC1  | SHC adaptor protein 1 | PF3D7_1243<br>900 | PFL2110c    |                                                                                         |                   |            |
| SHPK  | sedoheptulokinase     | PF3D7_1351<br>600 | PF13_0269   |                                                                                         |                   |            |
| SLK   | STE20 like kinase     | PF3D7_0309<br>000 | PFC0380w    | dual-specificity protein phosphatase, putative                                          | Troph/Gametocytes |            |
| SLK   | STE20 like kinase     | PF3D7_0317<br>200 | PFC0755c    | protein kinase, putative [Plasmodium falciparum 3D7]                                    | Schizont          | GO:0006468 |
| SLK   | STE20 like kinase     | PF3D7_1030<br>800 | PF10_0301   | calmodulin, putative [Plasmodium falciparum 3D7]                                        | Global            | GO:0005509 |
| SLK   | STE20 like kinase     | PF3D7_1121<br>300 | PF11_0220   | hypothetical protein                                                                    | Troph/Gametocytes |            |
| SLK   | STE20 like kinase     | PF3D7_1135<br>100 | PF11_0362   | protein phosphatase, putative [Plasmodium falciparum 3D7]                               | Ring/Schizont     | None       |
| SLK   | STE20 like kinase     | PF3D7_1247<br>400 | PFL2275c    | FK506-binding protein (FKBP)-type peptidyl-propyl isomerase [Plasmodium falciparum 3D7] | Troph             | GO:0006457 |
| SLK   | STE20 like kinase     | PF3D7_1342<br>400 | PF13_0232   | casein kinase II beta chain [Plasmodium falciparum 3D7]                                 | Troph             | GO:0004674 |
| SMAP2 | small ArfGAP2         | PF3D7_1359<br>800 | MAL13P1.297 |                                                                                         |                   |            |

Sheet1

|       |                                                    |               |           |                                                                                         |                   |            |
|-------|----------------------------------------------------|---------------|-----------|-----------------------------------------------------------------------------------------|-------------------|------------|
| SNX9  | sorting nexin 9                                    | PF3D7_1121300 | PF11_0220 | hypothetical protein                                                                    | Troph/Gametocytes |            |
| SPTA1 | spectrin alpha, erythrocytic 1                     | PF3D7_0613900 | PFF0675c  | myosin E [Plasmodium falciparum 3D7]                                                    | Schizont          | GO:0003774 |
| SPTA1 | spectrin alpha, erythrocytic 1                     | PF3D7_1121300 | PF11_0220 | hypothetical protein                                                                    | Troph/Gametocytes |            |
| SRPK1 | SRSF protein kinase 1                              | PF3D7_0309000 | PFC0380w  | dual-specificity protein phosphatase, putative                                          | Troph/Gametocytes |            |
| SRPK1 | SRSF protein kinase 1                              | PF3D7_0317200 | PFC0755c  | protein kinase, putative [Plasmodium falciparum 3D7]                                    | Schizont          | GO:0006468 |
| SRPK1 | SRSF protein kinase 1                              | PF3D7_1121300 | PF11_0220 | hypothetical protein                                                                    | Troph/Gametocytes |            |
| SRPK1 | SRSF protein kinase 1                              | PF3D7_1135100 | PF11_0362 | protein phosphatase, putative [Plasmodium falciparum 3D7]                               | Ring/Schizont     | None       |
| SRPK1 | SRSF protein kinase 1                              | PF3D7_1247400 | PFL2275c  | FK506-binding protein (FKBP)-type peptidyl-propyl isomerase [Plasmodium falciparum 3D7] | Troph             | GO:0006457 |
| SRPK1 | SRSF protein kinase 1                              | PF3D7_1342400 | PF13_0232 | casein kinase II beta chain [Plasmodium falciparum 3D7]                                 | Troph             | GO:0004674 |
| STAT6 | signal transducer and activator of transcription 6 | PF3D7_1121300 | PF11_0220 | hypothetical protein                                                                    | Troph/Gametocytes |            |
| STAT6 | signal transducer and activator of transcription 6 | PF3D7_1243900 | PFL2110c  | conserved protein [Plasmodium falciparum 3D7]                                           |                   |            |

Sheet1

|       |                                 |               |           |                                                                                         |                   |            |
|-------|---------------------------------|---------------|-----------|-----------------------------------------------------------------------------------------|-------------------|------------|
| STIP1 | stress induced phosphoprotein 1 | PF3D7_0515300 | PFE0765w  | phosphatidylinositol 3-kinase, putative [Plasmodium falciparum 3D7]                     | Global            | GO:0006897 |
| STIP1 | stress induced phosphoprotein 1 | PF3D7_0601600 | PFF0080c  |                                                                                         |                   |            |
| STIP1 | stress induced phosphoprotein 1 | PF3D7_0631000 | PFF1505w  | TPR-like domain containing protein, putative [Plasmodium falciparum 3D7]                |                   |            |
| STK10 | serine/threonine kinase 10      | PF3D7_0309000 | PFC0380w  | dual-specificity protein phosphatase, putative                                          | Troph/Gametocytes |            |
| STK10 | serine/threonine kinase 10      | PF3D7_0317200 | PFC0755c  | protein kinase, putative [Plasmodium falciparum 3D7]                                    | Schizont          | GO:0006468 |
| STK10 | serine/threonine kinase 10      | PF3D7_1030800 | PF10_0301 | calmodulin, putative [Plasmodium falciparum 3D7]                                        | Global            | GO:0005509 |
| STK10 | serine/threonine kinase 10      | PF3D7_1121300 | PF11_0220 | hypothetical protein                                                                    | Troph/Gametocytes |            |
| STK10 | serine/threonine kinase 10      | PF3D7_1135100 | PF11_0362 | protein phosphatase, putative [Plasmodium falciparum 3D7]                               | Ring/Schizont     | None       |
| STK10 | serine/threonine kinase 10      | PF3D7_1247400 | PFL2275c  | FK506-binding protein (FKBP)-type peptidyl-propyl isomerase [Plasmodium falciparum 3D7] | Troph             | GO:0006457 |



Sheet1

|       |                                   |                   |           |                                                                                                                      |                       |            |
|-------|-----------------------------------|-------------------|-----------|----------------------------------------------------------------------------------------------------------------------|-----------------------|------------|
| STK10 | serine/<br>threonine<br>kinase 10 | PF3D7_1342<br>400 | PF13_0232 | casein<br>kinase II beta<br>chain<br>[Plasmodium<br>falciparum<br>3D7]                                               | Troph                 | GO:0004674 |
| STK24 | serine/<br>threonine<br>kinase 24 | PF3D7_0309<br>000 | PFC0380w  | dual-<br>specificity<br>protein<br>phosphatase<br>, putative                                                         | Troph/<br>Gametocytes |            |
| STK24 | serine/<br>threonine<br>kinase 24 | PF3D7_0317<br>200 | PFC0755c  | protein<br>kinase,<br>putative<br>[Plasmodium<br>falciparum<br>3D7]                                                  | Schizont              | GO:0006468 |
| STK24 | serine/<br>threonine<br>kinase 24 | PF3D7_1030<br>800 | PF10_0301 | calmodulin,<br>putative<br>[Plasmodium<br>falciparum<br>3D7]                                                         | Global                | GO:0005509 |
| STK24 | serine/<br>threonine<br>kinase 24 | PF3D7_1121<br>300 | PF11_0220 | hypothetical<br>protein                                                                                              | Troph/<br>Gametocytes |            |
| STK24 | serine/<br>threonine<br>kinase 24 | PF3D7_1135<br>100 | PF11_0362 | protein<br>phosphatase<br>, putative<br>[Plasmodium<br>falciparum<br>3D7]                                            | Ring/Schizont         | None       |
| STK24 | serine/<br>threonine<br>kinase 24 | PF3D7_1247<br>400 | PFL2275c  | FK506-<br>binding<br>protein<br>(FKBP)-type<br>peptidyl-<br>propyl<br>isomerase<br>[Plasmodium<br>falciparum<br>3D7] | Troph                 | GO:0006457 |
| STK24 | serine/<br>threonine<br>kinase 24 | PF3D7_1342<br>400 | PF13_0232 | casein<br>kinase II beta<br>chain<br>[Plasmodium<br>falciparum<br>3D7]                                               | Troph                 | GO:0004674 |
| STK38 | serine/<br>threonine<br>kinase 38 | PF3D7_0309<br>000 | PFC0380w  | dual-<br>specificity<br>protein<br>phosphatase<br>, putative                                                         | Troph/<br>Gametocytes |            |
| STK38 | serine/<br>threonine<br>kinase 38 | PF3D7_0317<br>200 | PFC0755c  | protein<br>kinase,<br>putative<br>[Plasmodium<br>falciparum<br>3D7]                                                  | Schizont              | GO:0006468 |

Sheet1

|       |                                                                     |                   |           |                                                                                                                      |                       |            |
|-------|---------------------------------------------------------------------|-------------------|-----------|----------------------------------------------------------------------------------------------------------------------|-----------------------|------------|
| STK38 | serine/<br>threonine<br>kinase 38                                   | PF3D7_1030<br>800 | PF10_0301 | calmodulin,<br>putative<br>[Plasmodium<br>falciparum<br>3D7]                                                         | Global                | GO:0005509 |
| STK38 | serine/<br>threonine<br>kinase 38                                   | PF3D7_1121<br>300 | PF11_0220 | hypothetical<br>protein                                                                                              | Troph/<br>Gametocytes |            |
| STK38 | serine/<br>threonine<br>kinase 38                                   | PF3D7_1135<br>100 | PF11_0362 | protein<br>phosphatase<br>, putative<br>[Plasmodium<br>falciparum<br>3D7]                                            | Ring/Schizont         | None       |
| STK38 | serine/<br>threonine<br>kinase 38                                   | PF3D7_1247<br>400 | PFL2275c  | FK506-<br>binding<br>protein<br>(FKBP)-type<br>peptidyl-<br>propyl<br>isomerase<br>[Plasmodium<br>falciparum<br>3D7] | Troph                 | GO:0006457 |
| STK38 | serine/<br>threonine<br>kinase 38                                   | PF3D7_1342<br>400 | PF13_0232 | casein<br>kinase II beta<br>chain<br>[Plasmodium<br>falciparum<br>3D7]                                               | Troph                 | GO:0004674 |
| STRAP | serine/<br>threonine<br>kinase<br>receptor<br>associated<br>protein | PF3D7_1036<br>700 | PF10_0359 |                                                                                                                      |                       |            |
| STX16 | syntaxin 16                                                         | PF3D7_0613<br>700 | PFF0665c  | syntaxin<br>binding<br>protein,<br>putative<br>[Plasmodium<br>falciparum<br>3D7]                                     | Global                | GO:0006904 |
| STX16 | syntaxin 16                                                         | PF3D7_1243<br>900 | PFL2110c  | conserved<br>protein<br>[Plasmodium<br>falciparum<br>3D7]                                                            |                       |            |
| STX4  | syntaxin 4                                                          | PF3D7_0613<br>700 | PFF0665c  | syntaxin<br>binding<br>protein,<br>putative<br>[Plasmodium<br>falciparum<br>3D7]                                     | Global                | GO:0006904 |

Sheet1

|       |                                            |                   |           |                                                                                  |                       |            |
|-------|--------------------------------------------|-------------------|-----------|----------------------------------------------------------------------------------|-----------------------|------------|
| STX4  | syntaxin 4                                 | PF3D7_1243<br>900 | PFL2110c  | conserved<br>protein<br>[Plasmodium<br>falciparum<br>3D7]                        |                       |            |
| STX6  | syntaxin 6                                 | PF3D7_0613<br>700 | PFF0665c  | syntaxin<br>binding<br>protein,<br>putative<br>[Plasmodium<br>falciparum<br>3D7] | Global                | GO:0006904 |
| STX6  | syntaxin 6                                 | PF3D7_1243<br>900 | PFL2110c  | conserved<br>protein<br>[Plasmodium<br>falciparum<br>3D7]                        |                       |            |
| STX7  | syntaxin 7                                 | PF3D7_0613<br>700 | PFF0665c  | syntaxin<br>binding<br>protein,<br>putative<br>[Plasmodium<br>falciparum<br>3D7] | Global                | GO:0006904 |
| STX7  | syntaxin 7                                 | PF3D7_1243<br>900 | PFL2110c  | conserved<br>protein<br>[Plasmodium<br>falciparum<br>3D7]                        |                       |            |
| SYK   | spleen<br>associated<br>tyrosine<br>kinase | PF3D7_0514<br>300 | PFE0715w  | aspartyl t-<br>RNA<br>synthetase,<br>putative                                    | Merozoites            |            |
| SYK   | spleen<br>associated<br>tyrosine<br>kinase | PF3D7_0628<br>800 | PFF1395c  |                                                                                  |                       |            |
| TAOK3 | TAO kinase<br>3                            | PF3D7_0309<br>000 | PFC0380w  | dual-<br>specificity<br>protein<br>phosphatase<br>, putative                     | Troph/<br>Gametocytes |            |
| TAOK3 | TAO kinase<br>3                            | PF3D7_0317<br>200 | PFC0755c  | protein<br>kinase,<br>putative<br>[Plasmodium<br>falciparum<br>3D7]              | Schizont              | GO:0006468 |
| TAOK3 | TAO kinase<br>3                            | PF3D7_1030<br>800 | PF10_0301 | calmodulin,<br>putative<br>[Plasmodium<br>falciparum<br>3D7]                     | Global                | GO:0005509 |
| TAOK3 | TAO kinase<br>3                            | PF3D7_1121<br>300 | PF11_0220 | hypothetical<br>protein                                                          | Troph/<br>Gametocytes |            |

Sheet1

|       |                                             |               |           |                                                                                         |                       |            |
|-------|---------------------------------------------|---------------|-----------|-----------------------------------------------------------------------------------------|-----------------------|------------|
| TAOK3 | TAO kinase 3                                | PF3D7_1135100 | PF11_0362 | protein phosphatase, putative [Plasmodium falciparum 3D7]                               | Ring/Schizont         | None       |
| TAOK3 | TAO kinase 3                                | PF3D7_1247400 | PFL2275c  | FK506-binding protein (FKBP)-type peptidyl-propyl isomerase [Plasmodium falciparum 3D7] | Troph                 | GO:0006457 |
| TAOK3 | TAO kinase 3                                | PF3D7_1342400 | PF13_0232 | casein kinase II beta chain [Plasmodium falciparum 3D7]                                 | Troph                 | GO:0004674 |
| TBCB  | tubulin folding cofactor B                  | PF3D7_0906910 | PFI0335w  | tubulin-specific chaperone, putative [Plasmodium falciparum 3D7]                        | Global                | None       |
| TCEA1 | transcription elongation factor A1          | PF3D7_0215700 | PF02_0148 |                                                                                         |                       |            |
| TFG   | trafficking from ER to golgi regulator      | PF3D7_0317200 | PFC0755c  | protein kinase, putative [Plasmodium falciparum 3D7]                                    | Schizont              | GO:0006468 |
| TKT   | transketolase                               | PF3D7_0820700 | PF08_0045 | 2-oxoglutarate dehydrogenase E1 component [Plasmodium falciparum 3D7]                   | Global                | GO:0006096 |
| TLN1  | talin 1                                     | PF3D7_1121300 | PF11_0220 | hypothetical protein                                                                    | Troph/<br>Gametocytes |            |
| TLN2  | talin 2                                     | PF3D7_1121300 | PF11_0220 | hypothetical protein                                                                    | Troph/<br>Gametocytes |            |
| TMX1  | thioredoxin related transmembrane protein 1 | PF3D7_1411400 | PF14_0112 |                                                                                         |                       |            |

Sheet1

|       |                                             |                   |           |                                                                            |                       |            |
|-------|---------------------------------------------|-------------------|-----------|----------------------------------------------------------------------------|-----------------------|------------|
| TNPO1 | transportin 1                               | PF3D7_0932<br>800 | PFI1590c  | conserved Plasmodium protein, unknown function [Plasmodium falciparum 3D7] | Unknown               | GO:0006886 |
| TNPO2 | transportin 2                               | PF3D7_0932<br>800 | PFI1590c  | conserved Plasmodium protein, unknown function [Plasmodium falciparum 3D7] | Unknown               | GO:0006886 |
| TRAP1 | TNF receptor associated protein 1           | PF3D7_0317<br>200 | PFC0755c  | protein kinase, putative [Plasmodium falciparum 3D7]                       | Schizont              | GO:0006468 |
| TRAP1 | TNF receptor associated protein 1           | PF3D7_1239<br>500 | PFL1915w  |                                                                            |                       |            |
| TWF1  | twinfilin actin binding protein 1           | PF3D7_0823<br>300 | PF08_0034 | histone acetyltransferase GCN5, putative [Plasmodium falciparum 3D7]       | Global                | GO:0006355 |
| TWF1  | twinfilin actin binding protein 1           | PF3D7_1121<br>300 | PF11_0220 | hypothetical protein                                                       | Troph/<br>Gametocytes |            |
| TWF2  | twinfilin actin binding protein 2           | PF3D7_0823<br>300 | PF08_0034 | histone acetyltransferase GCN5, putative [Plasmodium falciparum 3D7]       | Global                | GO:0006355 |
| TWF2  | twinfilin actin binding protein 2           | PF3D7_1121<br>300 | PF11_0220 | hypothetical protein                                                       | Troph/<br>Gametocytes |            |
| TXNL1 | thioredoxin like 1                          | PF3D7_1411<br>400 | PF14_0112 |                                                                            |                       |            |
| UBA3  | ubiquitin like modifier activating enzyme 3 | PF3D7_1237<br>000 | PFL1790w  | ubiquitin-activating enzyme, putative [Plasmodium falciparum 3D7]          | Global                | GO:0006464 |

Sheet1

|       |                                             |               |             |                                                                   |          |            |
|-------|---------------------------------------------|---------------|-------------|-------------------------------------------------------------------|----------|------------|
| UBA6  | ubiquitin like modifier activating enzyme 6 | PF3D7_1237000 | PFL1790w    | ubiquitin-activating enzyme, putative [Plasmodium falciparum 3D7] | Global   | GO:0006464 |
| UBAC1 | UBA domain containing 1                     | PF3D7_0317200 | PFC0755c    | protein kinase, putative [Plasmodium falciparum 3D7]              | Schizont | GO:0006468 |
| UBC   | ubiquitin C                                 | PF3D7_1355700 | MAL13P1.275 | protein phosphatase, putative [Plasmodium falciparum 3D7]         | Global   | None       |
| UBE2A | ubiquitin conjugating enzyme E2 A           | PF3D7_1237000 | PFL1790w    | ubiquitin-activating enzyme, putative [Plasmodium falciparum 3D7] | Global   | GO:0006464 |
| UBE2A | ubiquitin conjugating enzyme E2 A           | PF3D7_1361900 | PF13_0328   | proliferating cell nuclear antigen [Plasmodium falciparum 3D7]    | Troph    | GO:0006275 |
| UBE2H | ubiquitin conjugating enzyme E2 H           | PF3D7_1237000 | PFL1790w    | ubiquitin-activating enzyme, putative [Plasmodium falciparum 3D7] | Global   | GO:0006464 |
| UBE2H | ubiquitin conjugating enzyme E2 H           | PF3D7_1361900 | PF13_0328   | proliferating cell nuclear antigen [Plasmodium falciparum 3D7]    | Troph    | GO:0006275 |
| UBE2K | ubiquitin conjugating enzyme E2 K           | PF3D7_0317200 | PFC0755c    | protein kinase, putative [Plasmodium falciparum 3D7]              | Schizont | GO:0006468 |
| UBE2K | ubiquitin conjugating enzyme E2 K           | PF3D7_1237000 | PFL1790w    | ubiquitin-activating enzyme, putative [Plasmodium falciparum 3D7] | Global   | GO:0006464 |

Sheet1

|       |                                            |                   |             |                                                                                      |          |            |
|-------|--------------------------------------------|-------------------|-------------|--------------------------------------------------------------------------------------|----------|------------|
| UBE2K | ubiquitin<br>conjugating<br>enzyme E2 K    | PF3D7_1361<br>900 | PF13_0328   | proliferating<br>cell nuclear<br>antigen<br>[Plasmodium<br>falciparum<br>3D7]        | Troph    | GO:0006275 |
| UBE2N | ubiquitin<br>conjugating<br>enzyme E2<br>N | PF3D7_1237<br>000 | PFL1790w    | ubiquitin-<br>activating<br>enzyme,<br>putative<br>[Plasmodium<br>falciparum<br>3D7] | Global   | GO:0006464 |
| UBE2N | ubiquitin<br>conjugating<br>enzyme E2<br>N | PF3D7_1361<br>900 | PF13_0328   | proliferating<br>cell nuclear<br>antigen<br>[Plasmodium<br>falciparum<br>3D7]        | Troph    | GO:0006275 |
| UBE2O | ubiquitin<br>conjugating<br>enzyme E2<br>O | PF3D7_1237<br>000 | PFL1790w    | ubiquitin-<br>activating<br>enzyme,<br>putative<br>[Plasmodium<br>falciparum<br>3D7] | Global   | GO:0006464 |
| UBE2O | ubiquitin<br>conjugating<br>enzyme E2<br>O | PF3D7_1361<br>900 | PF13_0328   | proliferating<br>cell nuclear<br>antigen<br>[Plasmodium<br>falciparum<br>3D7]        | Troph    | GO:0006275 |
| UBE3B | ubiquitin<br>protein ligase<br>E3B         | PF3D7_0613<br>900 | PFF0675c    | myosin E<br>[Plasmodium<br>falciparum<br>3D7]                                        | Schizont | GO:0003774 |
| UBE3B | ubiquitin<br>protein ligase<br>E3B         | PF3D7_1030<br>800 | PF10_0301   | calmodulin,<br>putative<br>[Plasmodium<br>falciparum<br>3D7]                         | Global   | GO:0005509 |
| UBL4A | ubiquitin like<br>4A                       | PF3D7_0317<br>200 | PFC0755c    | protein<br>kinase,<br>putative<br>[Plasmodium<br>falciparum<br>3D7]                  | Schizont | GO:0006468 |
| UBL4A | ubiquitin like<br>4A                       | PF3D7_1355<br>700 | MAL13P1.275 | protein<br>phosphatase<br>, putative<br>[Plasmodium<br>falciparum<br>3D7]            | Global   | None       |

Sheet1

|       |                      |               |           |                                                                                         |                    |            |
|-------|----------------------|---------------|-----------|-----------------------------------------------------------------------------------------|--------------------|------------|
| UBL4A | ubiquitin like 4A    | PF3D7_1361900 | PF13_0328 | proliferating cell nuclear antigen [Plasmodium falciparum 3D7]                          | Troph              | GO:0006275 |
| UBL7  | ubiquitin like 7     | PF3D7_0317200 | PFC0755c  | protein kinase, putative [Plasmodium falciparum 3D7]                                    | Schizont           | GO:0006468 |
| UBXN1 | UBX domain protein 1 | PF3D7_0317200 | PFC0755c  | protein kinase, putative [Plasmodium falciparum 3D7]                                    | Schizont           | GO:0006468 |
| ULK3  | unc-51 like kinase 3 | PF3D7_0309000 | PFC0380w  | dual-specificity protein phosphatase , putative                                         | Troph/ Gametocytes |            |
| ULK3  | unc-51 like kinase 3 | PF3D7_0317200 | PFC0755c  | protein kinase, putative [Plasmodium falciparum 3D7]                                    | Schizont           | GO:0006468 |
| ULK3  | unc-51 like kinase 3 | PF3D7_1030800 | PF10_0301 | calmodulin, putative [Plasmodium falciparum 3D7]                                        | Global             | GO:0005509 |
| ULK3  | unc-51 like kinase 3 | PF3D7_1121300 | PF11_0220 | hypothetical protein                                                                    | Troph/ Gametocytes |            |
| ULK3  | unc-51 like kinase 3 | PF3D7_1135100 | PF11_0362 | protein phosphatase , putative [Plasmodium falciparum 3D7]                              | Ring/Schizont      | None       |
| ULK3  | unc-51 like kinase 3 | PF3D7_1247400 | PFL2275c  | FK506-binding protein (FKBP)-type peptidyl-propyl isomerase [Plasmodium falciparum 3D7] | Troph              | GO:0006457 |
| ULK3  | unc-51 like kinase 3 | PF3D7_1342400 | PF13_0232 | casein kinase II beta chain [Plasmodium falciparum 3D7]                                 | Troph              | GO:0004674 |



Sheet1

|       |                                         |               |           |                                                                           |        |            |
|-------|-----------------------------------------|---------------|-----------|---------------------------------------------------------------------------|--------|------------|
| USP9X | ubiquitin specific peptidase 9 X-linked | PF3D7_1329300 | PF13_0149 | chromatin assembly factor 1 subunit, putative [Plasmodium falciparum 3D7] | Global | GO:0006333 |
| VPS45 | vacuolar protein sorting 45 homolog     | PF3D7_0613700 | PFF0665c  | syntaxin binding protein, putative [Plasmodium falciparum 3D7]            | Global | GO:0006904 |
| VPS4A | vacuolar protein sorting 4 homolog A    | PF3D7_0816600 | PF08_0063 | ClpB protein, putative [Plasmodium falciparum 3D7]                        | Troph  | GO:0000166 |
| VPS4A | vacuolar protein sorting 4 homolog A    | PF3D7_1116800 | PF11_0175 | heat shock protein 101, putative [Plasmodium falciparum 3D7]              | Ring   | GO:0006457 |
| VPS4A | vacuolar protein sorting 4 homolog A    | PF3D7_1361900 | PF13_0328 | proliferating cell nuclear antigen [Plasmodium falciparum 3D7]            | Troph  | GO:0006275 |
| VPS4A | vacuolar protein sorting 4 homolog A    | PF3D7_1406600 | PF14_0063 | ATP-dependent CLP protease, putative [Plasmodium falciparum 3D7]          | Global | GO:0008462 |
| VPS4B | vacuolar protein sorting 4 homolog B    | PF3D7_0816600 | PF08_0063 | ClpB protein, putative [Plasmodium falciparum 3D7]                        | Troph  | GO:0000166 |
| VPS4B | vacuolar protein sorting 4 homolog B    | PF3D7_1116800 | PF11_0175 | heat shock protein 101, putative [Plasmodium falciparum 3D7]              | Ring   | GO:0006457 |
| VPS4B | vacuolar protein sorting 4 homolog B    | PF3D7_1361900 | PF13_0328 | proliferating cell nuclear antigen [Plasmodium falciparum 3D7]            | Troph  | GO:0006275 |

Sheet1

| Gene  | Description                            | PF3D7 ID      | Accession       | Protein Name                                                                  | Location | GO Term    |
|-------|----------------------------------------|---------------|-----------------|-------------------------------------------------------------------------------|----------|------------|
| WBP4  | WW domain binding protein 4            | PF3D7_1367100 | MAL13P1.33E3D7] | U1 small nuclear ribonucleoprotein, putative [Plasmodium falciparum           | Global   | GO:0006396 |
| WDFY1 | WD repeat and FYVE domain containing 1 | PF3D7_1036700 | PF10_0359       |                                                                               |          |            |
| WDFY1 | WD repeat and FYVE domain containing 1 | PF3D7_1329300 | PF13_0149       | chromatin assembly factor 1 subunit, putative [Plasmodium falciparum 3D7]     | Global   | GO:0006333 |
| WDR1  | WD repeat domain 1                     | PF3D7_0909900 | PFI0480w        | helicase with Zn-finger motif, putative [Plasmodium falciparum 3D7]           | Global   | GO:0003676 |
| WDR1  | WD repeat domain 1                     | PF3D7_1036700 | PF10_0359       |                                                                               |          |            |
| WDR1  | WD repeat domain 1                     | PF3D7_1329300 | PF13_0149       | chromatin assembly factor 1 subunit, putative [Plasmodium falciparum 3D7]     | Global   | GO:0006333 |
| WDR26 | WD repeat domain 26                    | PF3D7_0816000 | PF08_0065       | nucleolar preribosomal assembly protein, putative [Plasmodium falciparum 3D7] | Ring     | None       |
| WDR44 | WD repeat domain 44                    | PF3D7_0816000 | PF08_0065       | nucleolar preribosomal assembly protein, putative [Plasmodium falciparum 3D7] | Ring     | None       |
| WDR44 | WD repeat domain 44                    | PF3D7_1036700 | PF10_0359       |                                                                               |          |            |

Sheet1

|       |                                       |               |           |                                                                                         |                       |            |
|-------|---------------------------------------|---------------|-----------|-----------------------------------------------------------------------------------------|-----------------------|------------|
| WDR44 | WD repeat domain 44                   | PF3D7_1329300 | PF13_0149 | chromatin assembly factor 1 subunit, putative [Plasmodium falciparum 3D7]               | Global                | GO:0006333 |
| WDR61 | WD repeat domain 61                   | PF3D7_0816000 | PF08_0065 | nucleolar preribosomal assembly protein, putative [Plasmodium falciparum 3D7]           | Ring                  | None       |
| WDR61 | WD repeat domain 61                   | PF3D7_0909900 | PFI0480w  | helicase with Zn-finger motif, putative [Plasmodium falciparum 3D7]                     | Global                | GO:0003676 |
| WNK1  | WNK lysine deficient protein kinase 1 | PF3D7_0309000 | PFC0380w  | dual-specificity protein phosphatase , putative                                         | Troph/<br>Gametocytes |            |
| WNK1  | WNK lysine deficient protein kinase 1 | PF3D7_0317200 | PFC0755c  | protein kinase, putative [Plasmodium falciparum 3D7]                                    | Schizont              | GO:0006468 |
| WNK1  | WNK lysine deficient protein kinase 1 | PF3D7_1121300 | PF11_0220 | hypothetical protein                                                                    | Troph/<br>Gametocytes |            |
| WNK1  | WNK lysine deficient protein kinase 1 | PF3D7_1247400 | PFL2275c  | FK506-binding protein (FKBP)-type peptidyl-propyl isomerase [Plasmodium falciparum 3D7] | Troph                 | GO:0006457 |
| WNK1  | WNK lysine deficient protein kinase 1 | PF3D7_1342400 | PF13_0232 | casein kinase II beta chain [Plasmodium falciparum 3D7]                                 | Troph                 | GO:0004674 |

Sheet1

|      |                      |               |          |                                                          |        |            |
|------|----------------------|---------------|----------|----------------------------------------------------------|--------|------------|
| YKT6 | YKT6 v-SNARE homolog | PF3D7_0405100 | PFD0250c | Sec24-like protein, putative [Plasmodium falciparum 3D7] | Global | GO:0006886 |
|------|----------------------|---------------|----------|----------------------------------------------------------|--------|------------|
